# Supplementary material for: The Internal Transcribed Spacer (ITS) Region and trnhH-psbA Are Suitable Candidate Loci for DNA Barcoding of Tropical Tree Species of India
Source: PubMed Central journal article supplement (PMC3584017; doi:10.1371/journal.pone.0057934), 2013-02-27

# A. ITS set 2

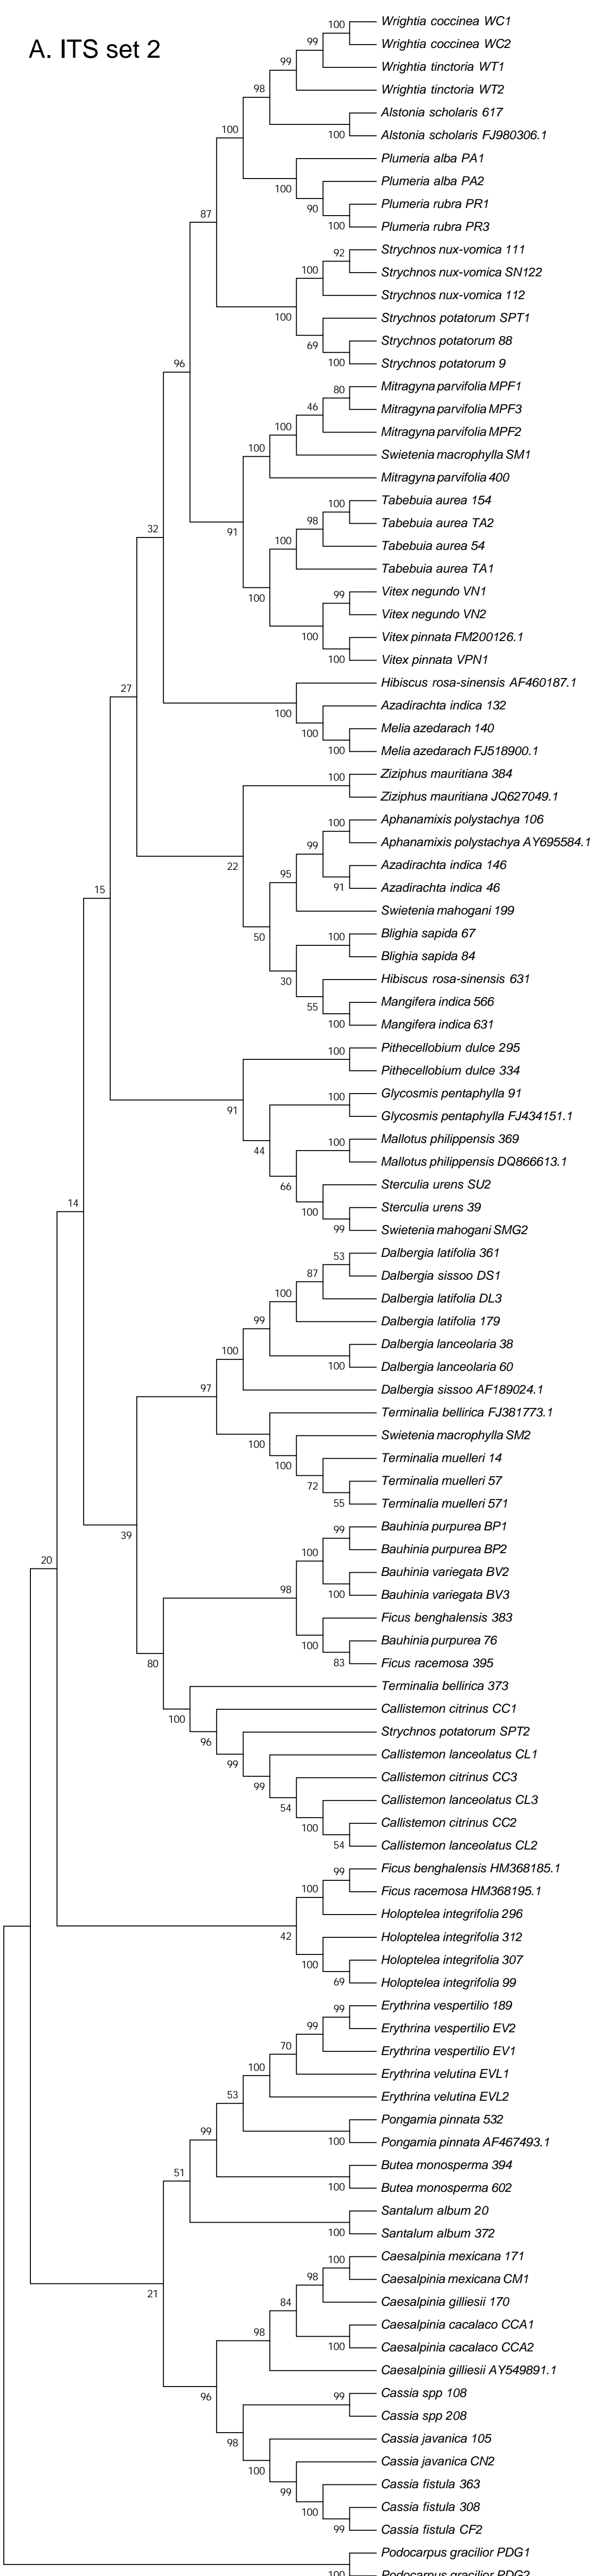

# B. ITS set 3

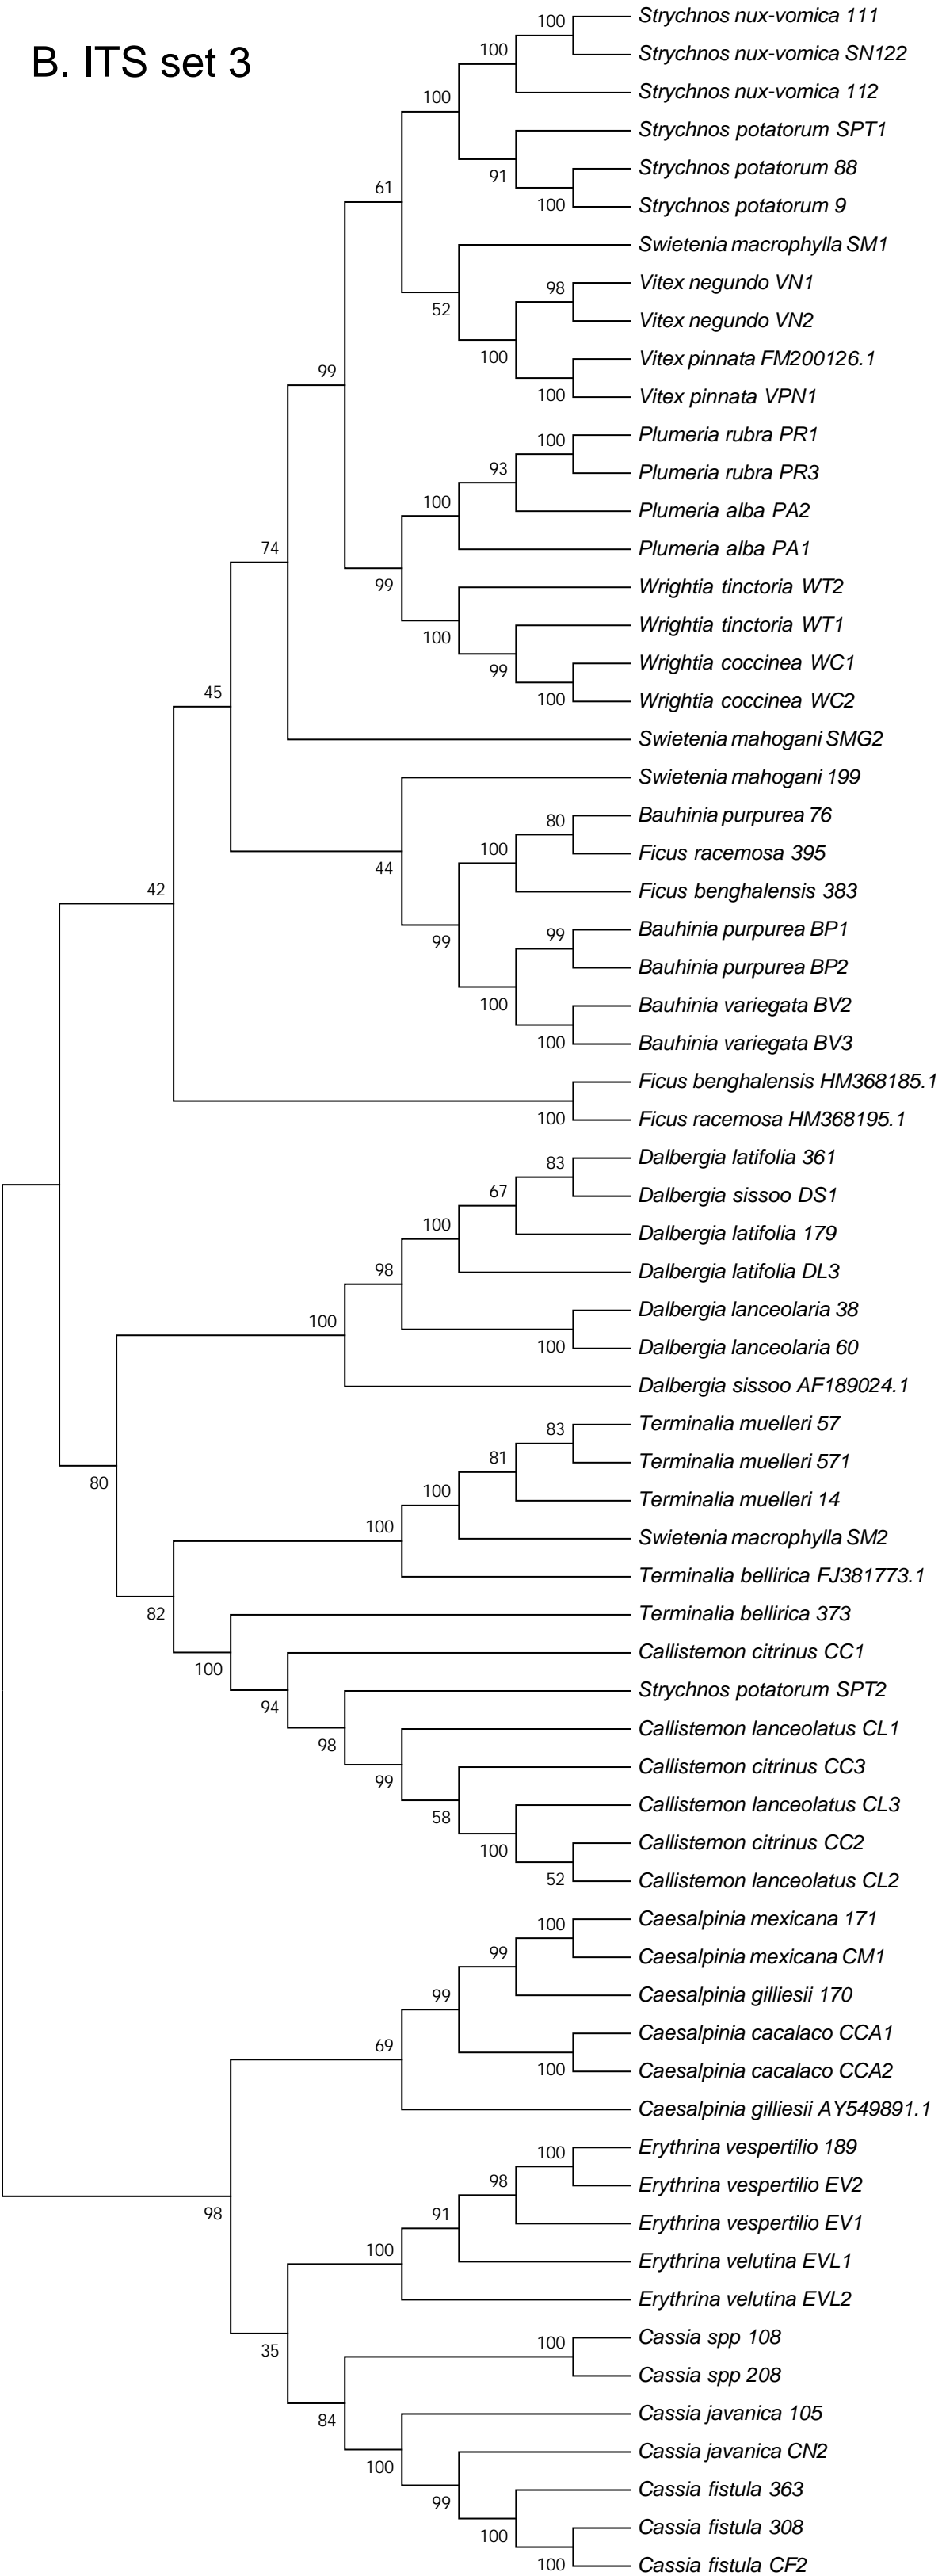

# C. rbcL set 2

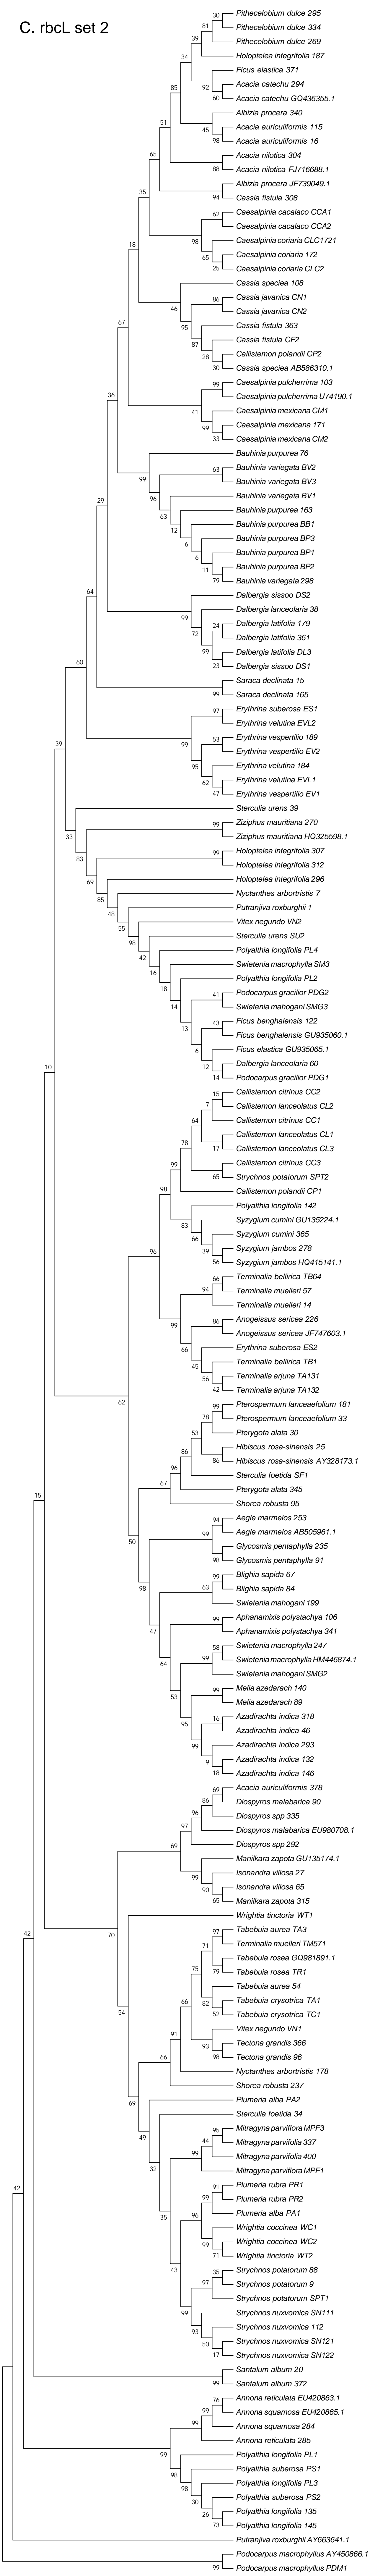

# D. rbcL set 3

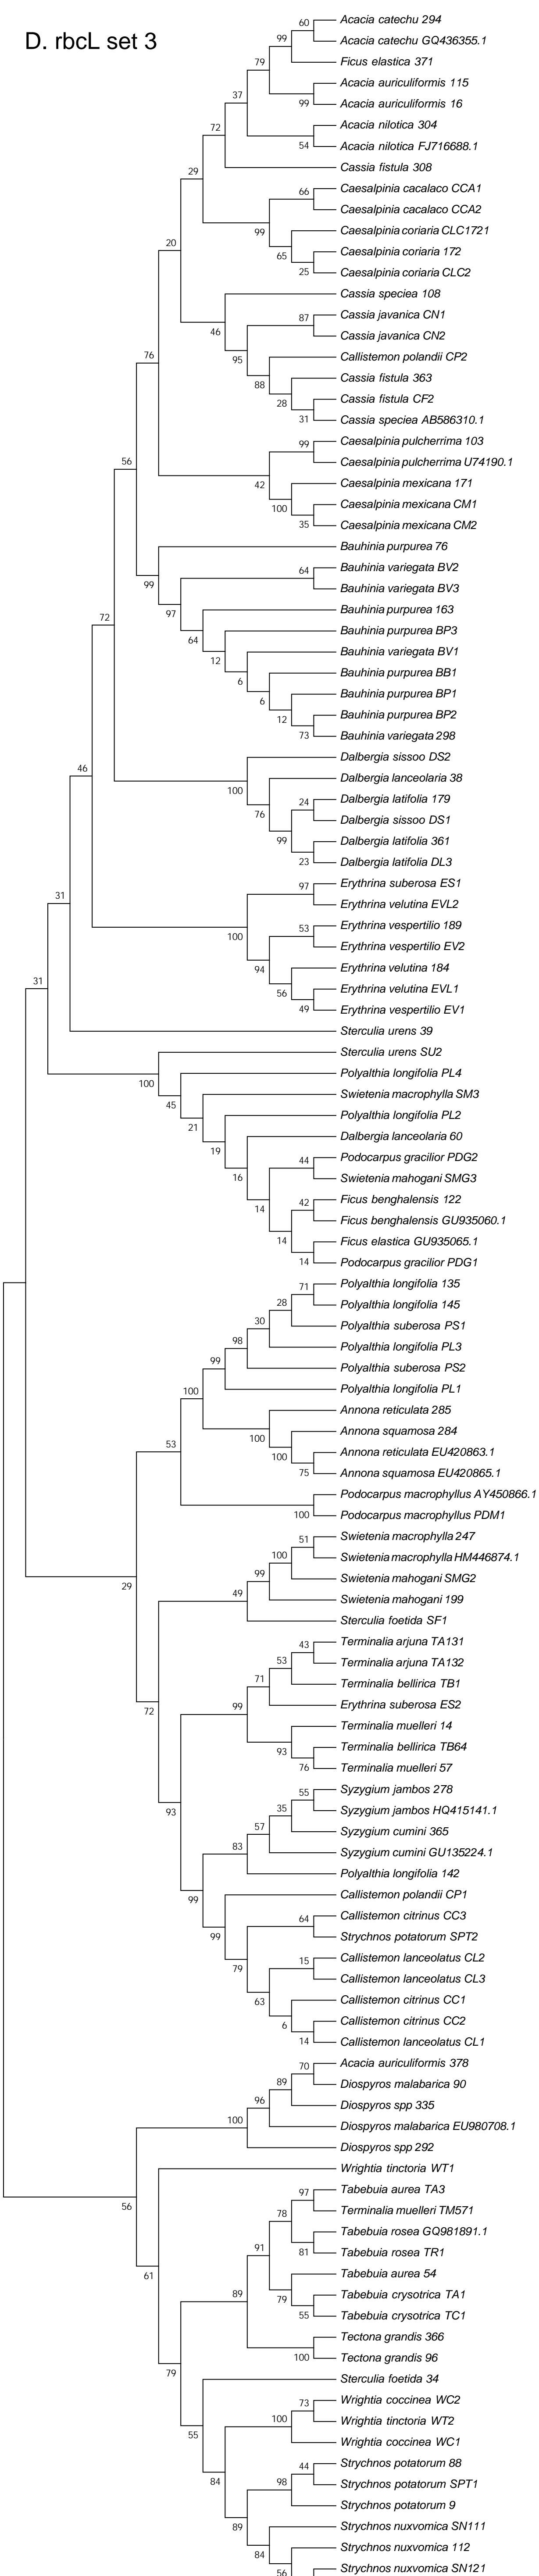

# E. trnH-psbA set2

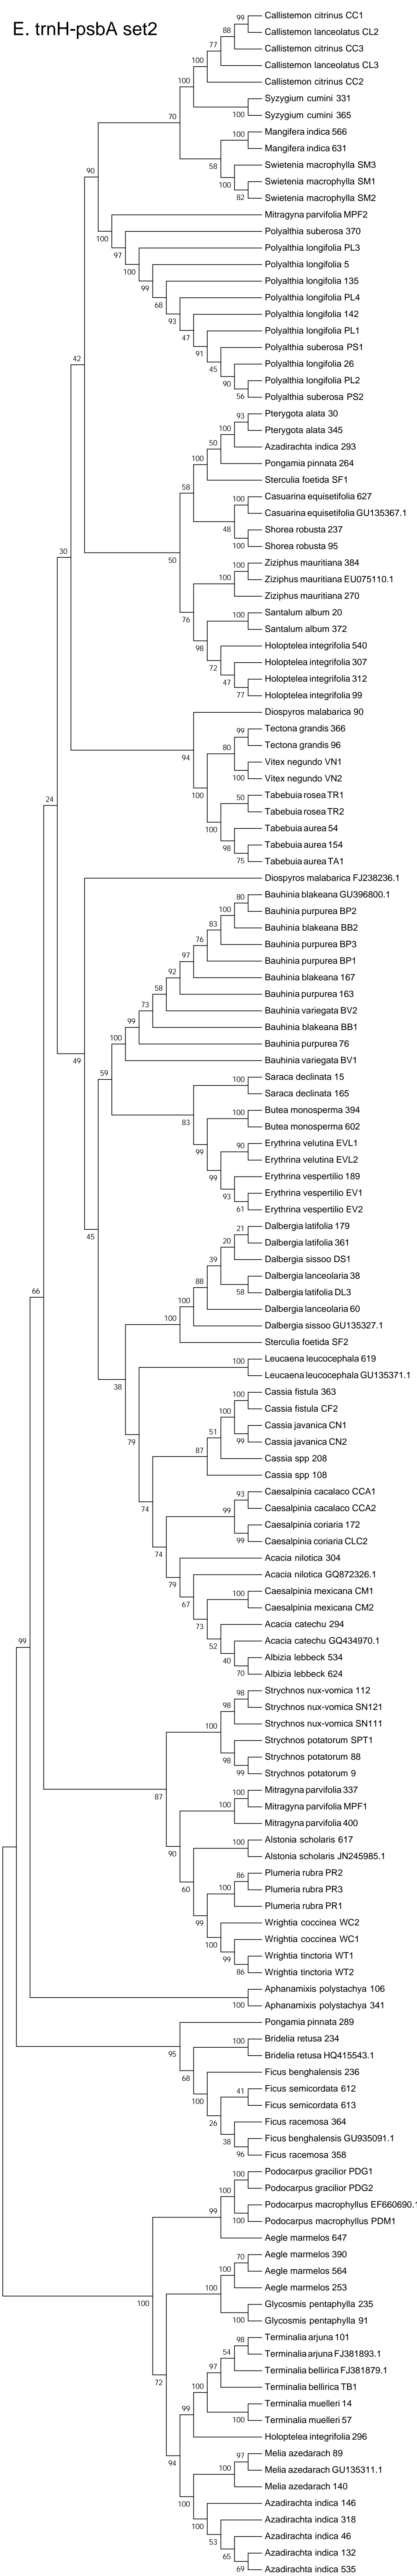

# F. trnH-psbA set 3

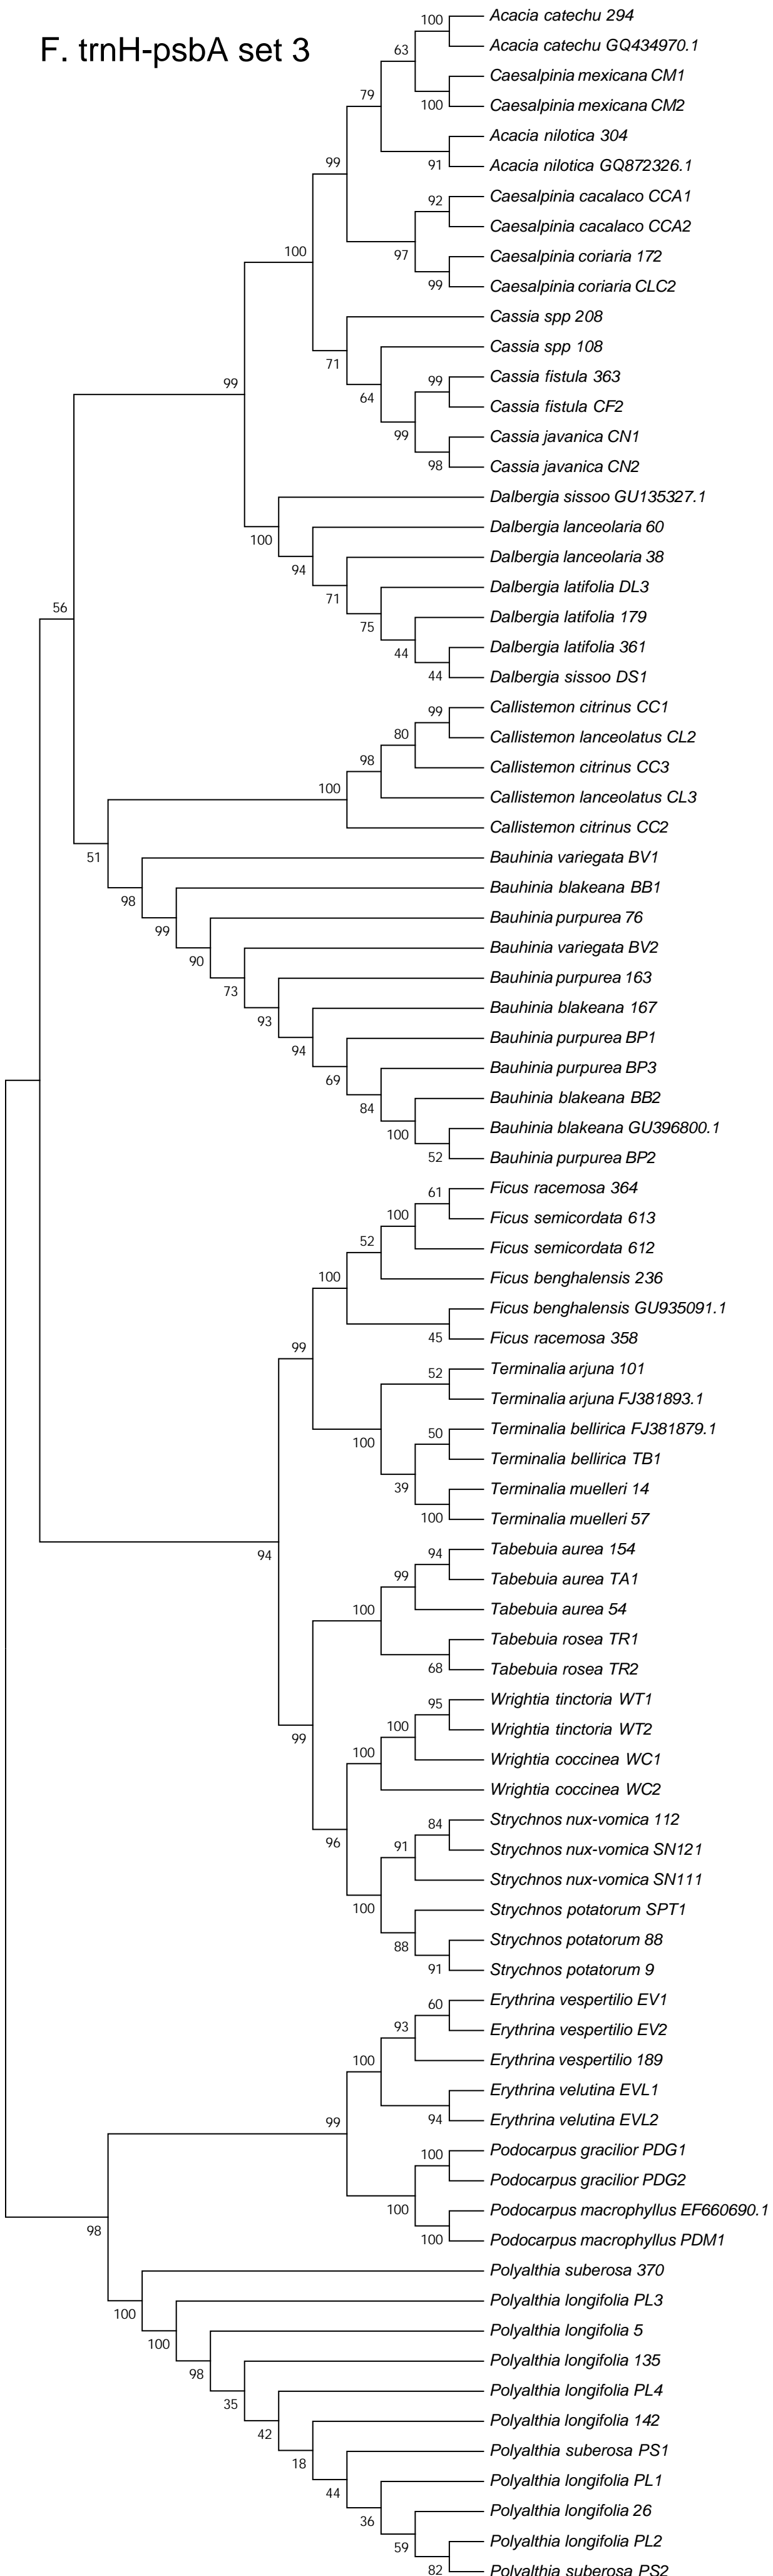

# G. ITS-2 set2

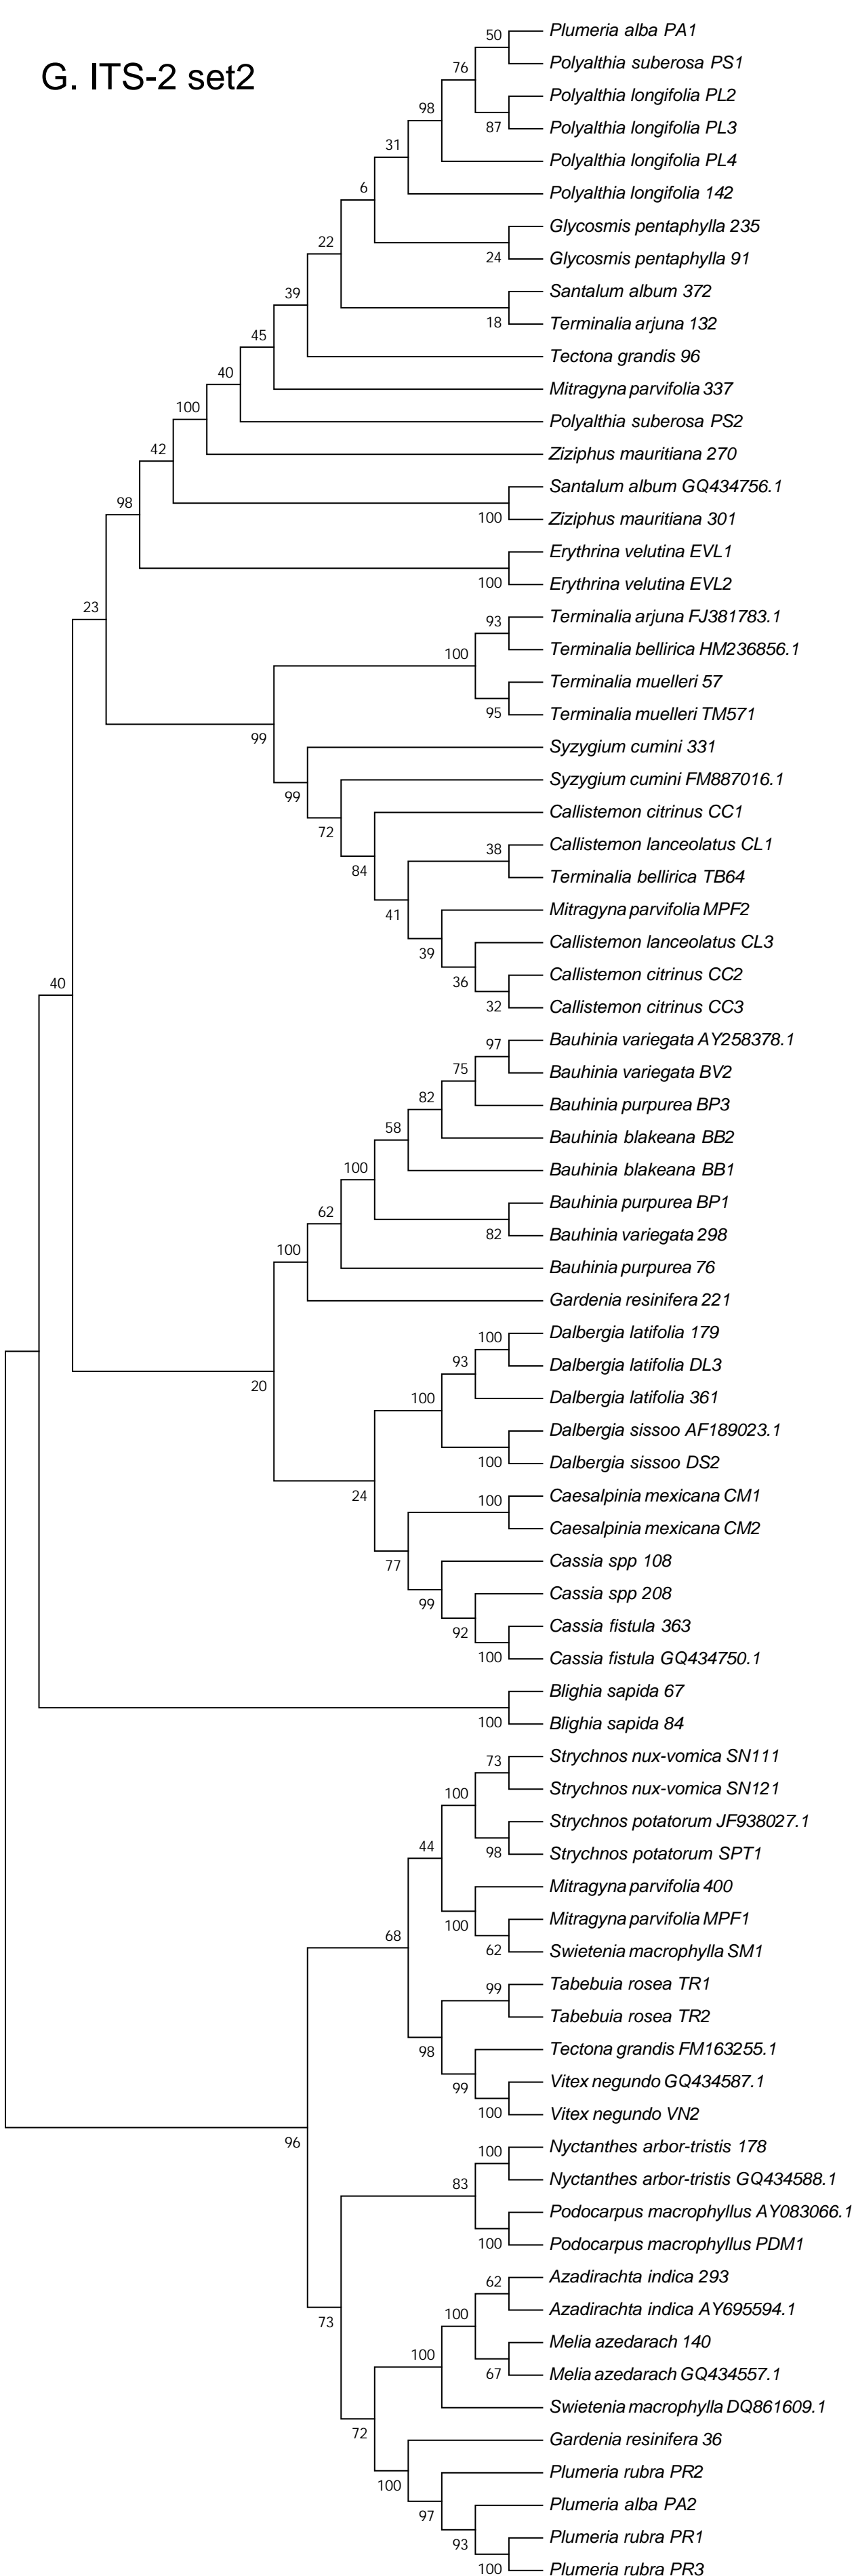

# H. ITS-2 set 3

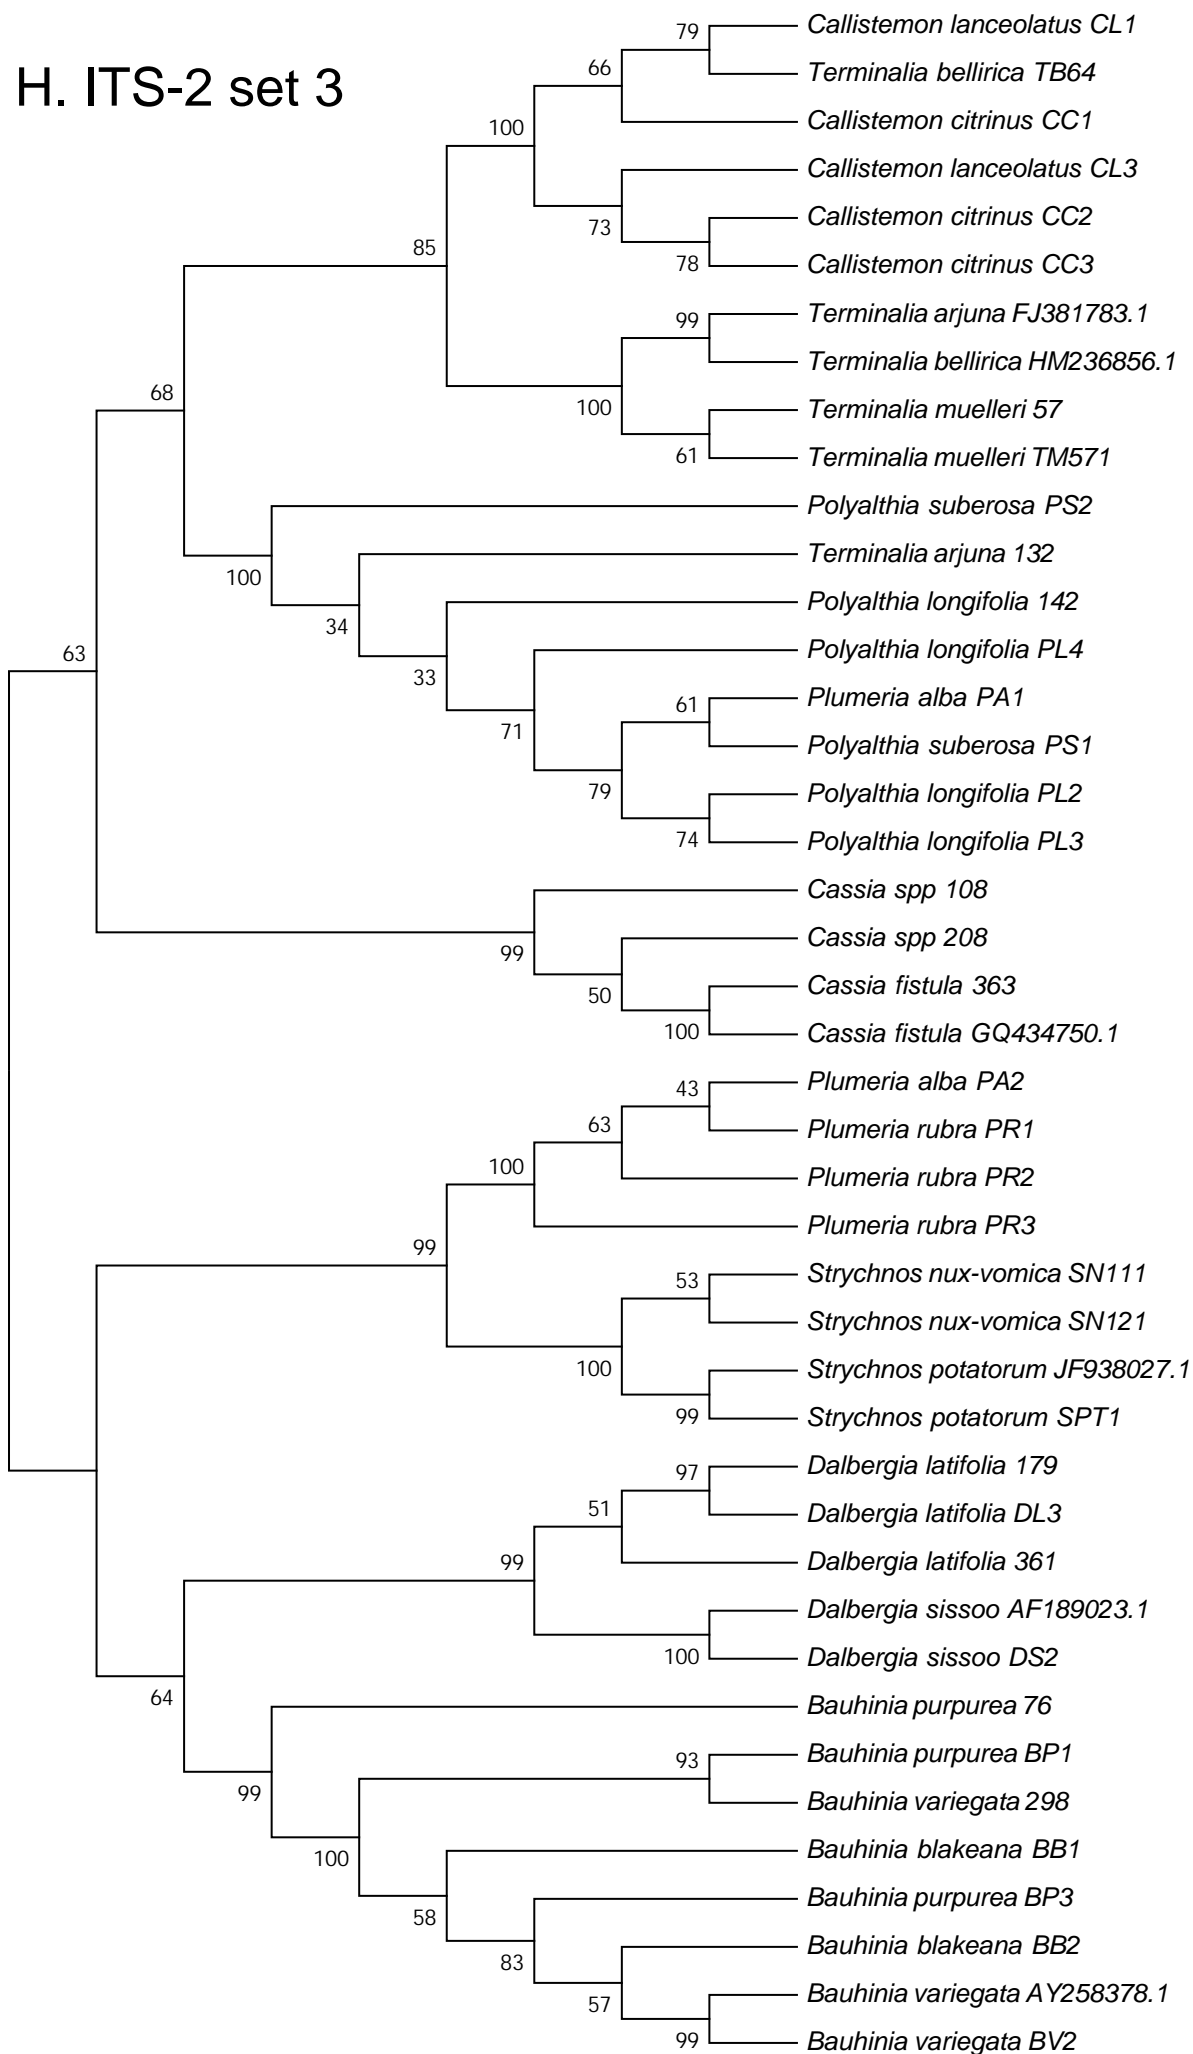



# I. ITS+trnH-psbA+rbcL

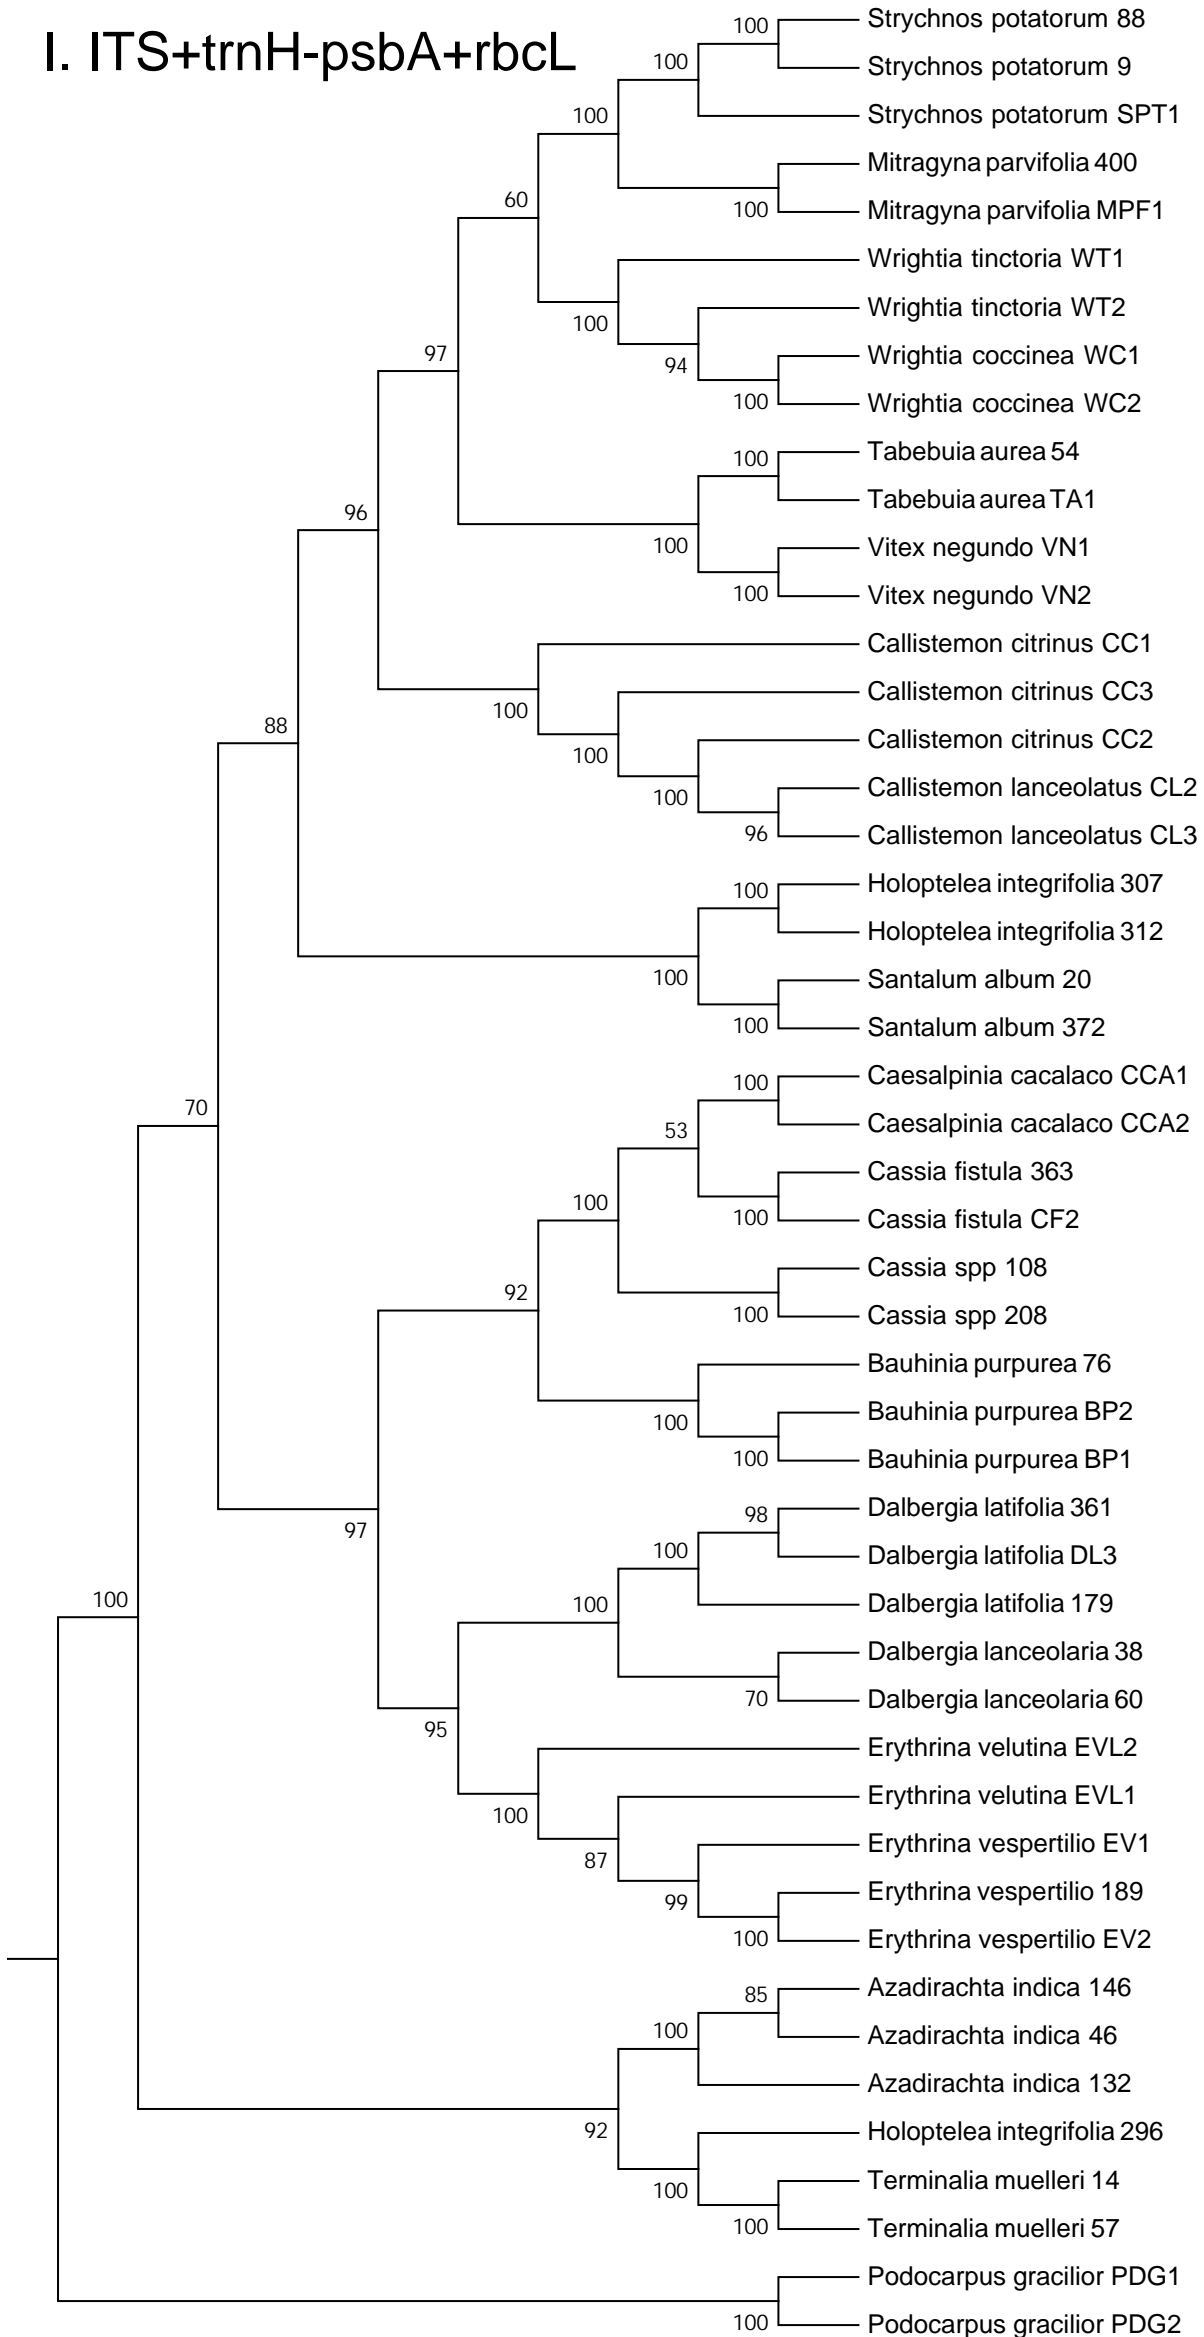

Supplement: pone.0057934.s001.pdf [file pone.0057934.s001.pdf]
