# Supplementary material for: The Internal Transcribed Spacer (ITS) Region and trnhH-psbA Are Suitable Candidate Loci for DNA Barcoding of Tropical Tree Species of India
Source: PubMed Central journal article supplement (PMC3584017; doi:10.1371/journal.pone.0057934), 2013-02-27
Supplement: pone.0057934.s003.pdf [file pone.0057934.s003.pdf]

Table S2: List of primer sequences (5'-3') and their references used in this study

| Locus             | Direction   | Sequence                | Reference                                                                                             |
|-------------------|-------------|-------------------------|-------------------------------------------------------------------------------------------------------|
| ITS5a             | Forward     | CCTTATCATTTAGAGGAAGGA   | (22)                                                                                                  |
| ITS4              | Reverse     | TCCTCCGCTTATTGATATGC    | (22)                                                                                                  |
| ITS2              | Forward     | ATGCGATACTTGGTGTGAAT    | (45)                                                                                                  |
|                   | Reverse     | GACGCTTCTCCAGACTACAAT   |                                                                                                       |
| <i>matK</i> 2.1a  | Forward     | ATCCATCTGGAAATCTTAGTTC  | <a href="http://www.kew.org/barcoding/protocols.html">http://www.kew.org/barcoding/protocols.html</a> |
| <i>matK</i> -NBRI | Forward     | TCCCATCCATCTGGAA        | (35)                                                                                                  |
| <i>matK</i> 3.2r  | Reverse     | ATCTATCGATAATATCAGAAT   | <a href="http://www.kew.org/barcoding/protocols.html">http://www.kew.org/barcoding/protocols.html</a> |
| <i>rbcL</i> 1F    | Forward     | ATGTCACCACAAACAGAAAC    | (22)                                                                                                  |
| <i>rbcL</i> 724r  | Reverse     | TCGCATGTACCTGCAGTAGC    | (22)                                                                                                  |
| <i>trnH-psbA</i>  | <i>trnH</i> | CGCGCATGGTGGATTCACAATCC | (22)                                                                                                  |
|                   | <i>psbA</i> | GTTATGCATGAACGTAATGCT   | (22)                                                                                                  |
