# Supplementary material for: The Internal Transcribed Spacer (ITS) Region and trnhH-psbA Are Suitable Candidate Loci for DNA Barcoding of Tropical Tree Species of India
Source: PLoS One. 2013 Feb 27;8(2):e57934. doi: 10.1371/journal.pone.0057934 (PMC3584017; doi:10.1371/journal.pone.0057934)
Supplement: Table S1 — List of tree species, accession numbers and DNA tube numbers used in this study. (XLSX) [file pone.0057934.s002.xlsx]

## Sheet: Sheet1
Table S1: List of samples with species name, family, accession number and their location
species	family	tube no	accession#	location
Acacia catechu (L.f.) Willd.	Fabaceae (Mimosoideae)	294	250169	Lucknow, Kukrail forest
Acacia lenticularis Benth.	Fabaceae (Mimosoideae)	85	249660	Lucknow NBRI, NBG *
Acacia modesta Wall.	Fabaceae (Mimosoideae)	59	249634	Lucknow, NBRI, NBG
Acacia nilotica (L.) Delile	Fabaceae (Mimosoideae)	304	250179	Lucknow, Kukrail forest
Acacia spp	Fabaceae (Mimosoideae)	100	249675	Lucknow,Musabagh
Acacia auriculiformis A. Cunn. ex Benth.	Fabaceae (Mimosoideae)	16	249067	Lucknow, NBRI, NBG
Acacia auriculiformis A. Cunn. ex Benth.	Fabaceae (Mimosoideae)	115	249690	Lucknow, NBRI, NBG
Acacia auriculiformis A. Cunn. ex Benth.	Fabaceae (Mimosoideae)	378	250253	Bahraich
Aegle marmelos (L.) Correa	Rutaceae	564	263602	Bahraich
Aegle marmelos (L.) Correa	Rutaceae	647	263911	Bahraich
Aegle marmelos (L.) Corrêa	Rutaceae	253	250128	Lucknow, NBRI, NBG
Aegle marmelos (L.) Corrêa	Rutaceae	390	250265	Bahraich,
Afrocarpus gracilior (Pilg.) Page	Podocarpaceae	PDG1	252730	Lucknow, NBRI, NBG
Afrocarpus gracilior (Pilg.) Page	Podocarpaceae	PDG2	252732	Lucknow, NBRI, NBG
Albizia lebbeck (L.) Benth.	Fabaceae(Mimosoideae)	534	252216	Bahraich
Albizia lebbeck (L.) Benth.	Fabaceae(Mimosoideae)	624	263726	Bahraich
Albizia amara (Roxb.) Boivin	Fabaceae (Mimosoideae)	205	249780	Lucknow, NBRI, NBG
Albizia lucidior (Steud.) I. C. Nielsen ex H. Hara	Fabaceae (Mimosoideae)	254	250129	Lucknow, NBRI, NBG
Albizia procera (Roxb.) Benth.	Fabaceae (Mimosoideae)	340	250215	Lucknow,Banthra
Alstonia scholaris (L.) R. Br.	Apocynaceae	617	263719	Bahraich
Alstonia macrophylla Wall. ex G. Don	Apocynaceae	117	249692	Lucknow,NBRI,NBG
Annona reticulata L.	Annonaceae	285	250160	Lucknow, NBRI, NBG
Anogeissus sericea Brandis	Combretaceae	226	250101	Lucknow, NBRI, NBG
Aphanamixis polystachya (Wall.) R. Parker	Meliaceae	106	249681	Lucknow, NBRI, NBG
Aphanamixis polystachya (Wall.) R. Parker	Meliaceae	341	250216	Lucknow,Banthra
Artocarpus heterophyllus Lam.	Moraceae	321	250196	Sitapur
Azadirachta indica A. Juss.	Meliaceae	46	249625	Masewal
Azadirachta indica A. Juss.	Meliaceae	132	249707	Lucknow, NBRI, NBG
Azadirachta indica A. Juss.	Meliaceae	146	249721	Lucknow
Azadirachta indica A. Juss.	Meliaceae	293	250168	Lucknow
Azadirachta indica A. Juss.	Meliaceae	318	250193	Sitapur
Azadirachta indica A. Juss.	Meliaceae	535	252217	Bahraich
Bauhinia acuminata L.	Fabaceae (Caesalpinioideae)	393	250268	Bahraich
Bauhinia malabarica Roxb.	Fabaceae (Caesalpinioideae)	561	252897	Bahraich
Bauhinia roxburghiana Voigt.	Fabaceae (Caesalpinioideae)	BR1	250157	Lucknow, NBRI,NBG
Bauhinia sp.	Fabaceae (Caesalpinioideae)	608	263710	Lakhimpur – Kheri
Bauhinia ×blakeana Dunn	Fabaceae (Caesalpinioideae)	167	249742	Lucknow, NBRI, NBG
Bauhinia ×blakeana Dunn	Fabaceae (Caesalpinioideae)	BB1	252773	Lucknow, NBRI, NBG
Bauhinia ×blakeana Dunn	Fabaceae (Caesalpinioideae)	BB2	252775	Lucknow, NBRI, NBG
Bauhinia purpurea L.	Fabaceae (Caesalpinioideae)	76	249651	Lucknow, NBRI, NBG
Bauhinia purpurea L.	Fabaceae (Caesalpinioideae)	163	250738	Lucknow, NBRI, NBG
Bauhinia purpurea L.	Fabaceae (Caesalpinioideae)	BP 1	249088	Lucknow, NBRI, NBG
Bauhinia purpurea L.	Fabaceae (Caesalpinioideae)	BP 2	252140	Bahraich
Bauhinia purpurea L.	Fabaceae (Caesalpinioideae)	BP 3	250400	Lucknow, NBRI, NBG
Bauhinia variegata L.	Fabaceae (Caesalpinioideae)	298	250173	Lucknow, Kukrail forest
Bauhinia variegata L.	Fabaceae (Caesalpinioideae)	BV 1	252770	Lucknow, NBRI, NBG
Bauhinia variegata L.	Fabaceae (Caesalpinioideae)	BV2	252771	Lucknow, NBRI, NBG
Bauhinia variegata L.	Fabaceae (Caesalpinioideae)	BV3	252772	Lucknow, NBRI, NBG
Blighia sapida K. D. Koenig	Sapindaceae	67	249642	Lucknow, NBRI, NBG
Blighia sapida K. D. Koenig	Sapindaceae	84	249659	Lucknow, NBRI, NBG
Brachychiton populneus (Schott & Endl.) R. Br.	Sterculiaceae	123	249698	Lucknow, NBRI, NBG
Brachychiton populneus (Schott & Endl.) R. Br.	Sterculiaceae	SD1	252726	Lucknow, NBRI, NBG,
Brachychiton populneus (Schott & Endl.) R. Br.	Sterculiaceae	SD2	252776	Lucknow, NBRI, NBG
Bridelia retusa (L.) A. Juss.	Phyllanthaceae	234	250109	Bahraich
Butea monosperma (Lam.) Taub.	Fabaceae (Papilionoideae)	187	249762	Lucknow, NBRI, NBG
Butea monosperma (Lam.) Taub.	Fabaceae (Papilionoideae)	394	250269	Bahraich
Butea monosperma (Lam.) Taub.	Fabaceae (Papilionoideae)	602	263704	Lakhimpur – Kheri
Caesalpinia spp	Fabaceae (Caesalpinioideae)	161	249736	Lucknow, NBRI, NBG
Caesalpinia cacalaco Humb. & Bonpl.	Fabaceae (Caesalpinioideae)	CCA1	252755	Lucknow, NBRI, NBG
Caesalpinia cacalaco Humb. & Bonpl.	Fabaceae (Caesalpinioideae)	CCA2	250396	Lucknow, NBRI, NBG
Caesalpinia coriaria (Jacq.) Willd.	Fabaceae (Caesalpinioideae)	172	249747	Lucknow, NBRI, NBG
Caesalpinia coriaria (Jacq.) Willd.	Fabaceae (Caesalpinioideae)	CLC1	252765	Lucknow, NBRI, NBG
Caesalpinia coriaria (Jacq.) Willd.	Fabaceae (Caesalpinioideae)	CLC1721	250394	Lucknow, NBRI, NBG
Caesalpinia coriaria (Jacq.) Willd.	Fabaceae (Caesalpinioideae)	CLC2	252758	Lucknow, NBRI, NBG
Caesalpinia gilliesii (Hook.) D. Dietr.	Fabaceae (Caesalpinioideae)	170	249745	Lucknow, NBRI, NBG
Caesalpinia mexicana A. Gray	Fabaceae (Caesalpinioideae)	171	249746	Lucknow, NBRI, NBG
Caesalpinia mexicana A. Gray	Fabaceae (Caesalpinioideae)	CM1	250395	Lucknow, NBRI, NBG
Caesalpinia mexicana A. Gray	Fabaceae (Caesalpinioideae)	CM2	252754	Lucknow, NBRI, NBG
Caesalpinia pannosa Brandegee	Fabaceae (Caesalpinioideae)	268	250143	Lucknow, NBRI, NBG
Caesalpinia pulcherrima (L.) Sw.	Fabaceae (Caesalpinioideae)	103	249678	Lucknow, NBRI,NBG
Callistemon citrinus (Curtis) Skeels	Myrtaceae	556	252876	Bahraich
Callistemon citrinus (Curtis) Skeels	Myrtaceae	CC 1	252719	Lucknow, NBRI, NBG
Callistemon citrinus (Curtis) Skeels	Myrtaceae	CC2	252724	Lucknow, NBRI, NBG
Callistemon citrinus (Curtis) Skeels	Myrtaceae	CC3	252737	Lucknow, NBRI, NBG
Callistemon lanceolatus (Sm.) Sweet	Myrtaceae	CL1	250397	Lucknow, NBRI, NBG
Callistemon lanceolatus (Sm.) Sweet	Myrtaceae	CL2	250398	Lucknow, NBRI, NBG
Callistemon lanceolatus (Sm.) Sweet	Myrtaceae	CL3	252729	Lucknow, NBRI, NBG
Callistemon polandii F.M.Bailey	Myrtaceae	177	249752	Lucknow, NBRI, NBG
Callistemon polandii F.M.Bailey	Myrtaceae	CP1	252760	Lucknow, NBRI, NBG
Callistemon polandii F.M.Bailey	Myrtaceae	CP2	252763	Lucknow, NBRI, NBG
Carissa spinarum L.	Apocynaceae	374	250249	Maharajganj
Cassia roxburghii DC.	Fabaceae (Caesalpinioideae)	362	250237	Kushinagar
Cassia sp	Fabaceae (Caesalpinioideae)	651	263915	Bahraich
Cassia spp	Fabaceae (Caesalpinioideae)	108	249683	Lucknow, NBRI, NBG
Cassia spp	Fabaceae (Caesalpinioideae)	208	249783	Lucknow, NBRI, NBG
Cassia fistula L.	Fabaceae (Caesalpinioideae)	308	250183	Lucknow, Kukrail forest
Cassia fistula L.	Fabaceae (Caesalpinioideae)	363	250238	Maharajganj
Cassia fistula L.	Fabaceae (Caesalpinioideae)	CF2	249734	Lucknow, NBRI, NBG
Cassia javanica L. subsp. nodosa (Buch.-Ham. ex Roxb.) K. Larsen & S. S. Larsen	Fabaceae (Caesalpinioideae)	CN1	249680	Lucknow, NBRI,NBG
Cassia javanica L. subsp. nodosa (Buch.-Ham. ex Roxb.) K. Larsen & S. S. Larsen	Fabaceae (Caesalpinioideae)	CN2	252762	Lucknow, NBRI, NBG
Casuarina equisetifolia L.	Casurinaceae	627	263729	Lakhimpur – Kheri
Casuarina equisetifolia L.	Casurinaceae	628	263730	Lakhimpur – Kheri
Ceiba pentandra (L.) Gaertn.	Bombacaceae	354	250229	Gorakhpur
Ceiba insignis (Kunth) P. E. Gibbs & Semir	Bombacaceae	3	249054	Lucknow, NBRI, NBG
Ceiba insignis (Kunth) P. E. Gibbs & Semir	Bombacaceae	12	249063	Lucknow, NBRI, NBG
Celtis tetrandra Roxb.	Cannabaceae	537	252219	Bahraich
Cordia dichotoma G. Forst.	Boraginaceae	386	250261	Bahraich
Dalbergia lanceolaria L. f.	Fabaceae (Papilionoideae)	38	249089	Lucknow, NBRI, NBG
Dalbergia lanceolaria L. f.	Fabaceae (Papilionoideae)	60	249635	Lucknow, NBRI, NBG
Dalbergia latifolia Roxb.	Fabaceae (Papilionoideae)	179	249754	Lucknow, NBRI, NBG
Dalbergia latifolia Roxb.	Fabaceae (Papilionoideae)	361	250236	Gorakhpur
Dalbergia latifolia Roxb.	Fabaceae (Papilionoideae)	DL3	252725	Lucknow, NBRI, NBG
Dalbergia sissoo Roxb. ex DC.	Fabaceae (Papilionoideae)	573	263611	Bahraich
Dalbergia sissoo Roxb. ex DC.	Fabaceae (Papilionoideae)	616	263718	Lakhimpur – Kheri
Dalbergia sissoo Roxb. ex DC.	Fabaceae (Papilionoideae)	DS1	250131	Lucknow, NBRI, NBG
Dalbergia sissoo Roxb. ex DC.	Fabaceae (Papilionoideae)	DS2	252747	Lucknow, NBRI, NBG
Derris ovalifolia (Wight & Arn.) Benth.	Fabaceae (Papilionoideae)	35	249086	Lucknow, NBRI, NBG
Desmodium oojeinense (Roxb.) Ohashi	Fabaceae (Papilionoideae)	359	250234	Gorakhpur
Diospyros spp	Ebenaceae	292	250167	Lucknow, Kukrail forest
Diospyros spp	Ebenaceae	335	250210	Lucknow,Banthra
Diospyros malabarica (Desr.) Kostel.	Ebenaceae	90	249665	Lucknow, NBRI, NBG
Ehretia laevis Roxb.	Ehretiaceae	569	263607	Bahraich
Ehretia laevis Roxb.	Ehretiaceae	389	250264	Bahraich
Emblica officinalis (Phyllanthus emblica)	Phyllanthaceae	606	263708	Lakhimpur – Kheri
Erythrina suberosa Roxb.	Fabaceae (Papilionoideae)	ES1	249760	Lucknow, NBRI, NBG
Erythrina suberosa Roxb.	Fabaceae (Papilionoideae)	ES2	252777	Lucknow, NBRI, NBG
Erythrina subumbrans (Hassk.) Merr.	Fabaceae (Papilionoideae)	182	249757	Lucknow, NBRI, NBG
Erythrina velutina Willd.	Fabaceae (Papilionoideae)	184	249759	Lucknow, NBRI, NBG
Erythrina velutina Willd.	Fabaceae (Papilionoideae)	EVL1	252779	Lucknow, NBRI, NBG
Erythrina velutina Willd.	Fabaceae (Papilionoideae)	EVL2	252778	Lucknow, NBRI, NBG
Erythrina vespertilio Benth.	Fabaceae (Papilionoideae)	189	249764	Lucknow, NBRI, NBG
Erythrina vespertilio Benth.	Fabaceae (Papilionoideae)	EV1	249765	Lucknow, NBRI, NBG
Erythrina vespertilio Benth.	Fabaceae (Papilionoideae)	EV2	249766	Lucknow, NBRI, NBG
Eucalyptus tereticornis Sm.	Myrtaceae	169	249744	Lucknow, NBRI, NBG
Ficus benghalensis L.	Moraceae	236	250111	Bahraich
Ficus benghalensis L.	Moraceae	383	250258	Bahraich
Ficus caulocarpa (Miq.) Miq	Moraceae	351	250226	Lucknow, Banthra
Ficus drupacea Thunb. var. pubescens (Roth) Corner	Moraceae	136	249711	Lucknow, NBRI, NBG
Ficus hispida L. f.	Moraceae	375	250250	Kushinagar
Ficus racemosa L.	Moraceae	358	250232	Gorakhpur
Ficus racemosa L.	Moraceae	364	250239	Maharajgan
Ficus racemosa L.	Moraceae	395	250270	Bahraich
Ficus racemosa L.	Moraceae	607	263709	Lakhimpur – Kheri
Ficus semicordata Buch. - Ham. ex J. E. Sm.	Moraceae	612	263714	Lakhimpur – Kheri
Ficus semicordata Buch. - Ham. ex J. E. Sm.	Moraceae	613	263715	Lakhimpur – Kheri
Ficus benghalensis L.	Moraceae	122	249697	Lucknow, NBRI, NBG
Ficus elastica Roxb. ex Hornem.	Moraceae	371	250246	Maharajganj
Ficus religiosa L.	Moraceae	130	249705	Lucknow, NBRI, NBG
Gardenia resinifera Roth	Rubiaceae	36	249087	Lucknow, NBRI, NBG
Gardenia resinifera Roth	Rubiaceae	221	249796	Lucknow, NBRI, NBG
Glycosmis pentaphylla (Retz.) DC.	Rutaceae	91	249666	Lucknow, NBRI, NBG
Glycosmis pentaphylla (Retz.) DC.	Rutaceae	235	250110	Bahraich
Gmelina arborea Roxb.	Verbenaceae	24	249075	Lucknow, NBRI, NBG
Haldina cordifolia	Rubiaceae	648	263912	Maharajganj
Haldina cordifolia (Roxb.) Ridsdale	Rubiaceae	399	250274	Bahraich,
Handroanthus chrysotrichus (Mart. ex DC.) Mattos	Bignoniaceae	TC1	250282	Lucknow, NBRI, NBG
Handroanthus impetiginosus (Mart. ex DC.) Mattos	Bignoniaceae	207	249782	Lucknow, NBRI, NBG
Hibiscus rosa-sinensis L.	Malvaceae	25	249076	Lucknow, NBRI, NBG
Hibiscus rosa-sinensis L.	Malvaceae	78	249653	Lucknow, NBRI, NBG
Hibiscus rosa-sinensis L.	Malvaceae	621	263723	Lakhimpur – Kheri
Holarrhena pubescens Wall. ex G. Don	Apocynaceae	279	250154	Lucknow, NBRI, NBG
Holoptelea integrifolia (Roxb.) Planch.	Ulmaceae	540	252236	Bahraich
Holoptelea integrifolia (Roxb.) Planch.	Ulmaceae	625	263727	Bahraich
Holoptelea integrifolia (Roxb.) Planch.	Ulmaceae	99	249674	Lucknow, Musabagh
Holoptelea integrifolia (Roxb.) Planch.	Ulmaceae	296	250171	Lucknow, Kukrail forest
Holoptelea integrifolia (Roxb.) Planch.	Ulmaceae	307	250182	Lucknow, Kukrail forest
Holoptelea integrifolia (Roxb.) Planch.	Ulmaceae	312	250187	Sitapur
Isonandra villosa Wight	Sapotaceae	27	249078	Lucknow, NBRI, NBG
Isonandra villosa Wight	Sapotaceae	65	249640	Lucknow, NBRI, NBG
Ixora pavetta Andrews	Rubiaceae	259	250134	Lucknow, NBRI, NBG
Jacaranda cuspidifolia Mart.	Bignoniaceae	121	249696	Lucknow, NBRI, NBG
Jacaranda mimosifolia D.Don	Bignoniaceae	53	249628	Lucknow, NBRI, NBG
Lagerstroemia hirsuta (Lam.) Willd.	Lythraceae	176	249751	Lucknow, NBRI, NBG
Lagerstroemia duperreana Pierre ex Gagnep.	Lythraceae	13	249064	Lucknow, NBRI, NBG
Lagerstroemia loudonii Teijsm. & Binn.	Lythraceae	283	250158	Lucknow, NBRI, NBG
Lagerstroemia parviflora Roxb.	Lythraceae	388	250263	Bahraich
Lagerstroemia speciosa (L.) Pers.	Lythraceae	79	249654	Lucknow, NBRI, NBG
Leucaena leucocephala (Lam.) de Wit.	Fabaceae(Mimosoideae)	619	263721	Lakhimpur – Kheri
Mallotus philippensis (Lam.) Muell.-Arg.	Euphorbiaceae	238	250113	Bahraich
Mallotus philippensis (Lam.) Muell.-Arg.	Euphorbiaceae	369	250244	Maharajganj
Mallotus philippensis (Lam.) Muell.-Arg.	Euphorbiaceae	611	263713	Lakhimpur – Kheri
Mangifera indica L.	Anacardiaceae	381	250256	Bahraich
Mangifera indica L.	Anacardiaceae	566	263604	Bahraich
Mangifera indica L.	Anacardiaceae	631	263733	Lakhimpur – Kheri
Manilkara hexandra (Roxb.) Dubard	Sapotaceae	233	250108	Lucknow, NBRI, NBG
Manilkara zapota (L.) P. Royen	Sapotaceae	63	249638	Lucknow, NBRI, NBG
Manilkara zapota (L.) P. Royen	Sapotaceae	315	250190	Sitapur
Melia azadirach L.	Meliaceae	45	249624	Masewal Ropar
Melia azadirach L.	Meliaceae	615	263717	Lakhimpur – Kheri
Melia azedarach L.	Meliaceae	89	249664	Lucknow, NBRI, NBG
Melia azedarach L.	Meliaceae	140	249715	Lucknow
Millettia peguensis Ali	Fabaceae (Papilionoideae)	173	249748	Lucknow, NBRI, NBG
Mitragyna parvifolia (Roxb.) Korth.	Rubiaceae	337	250212	Banthra research station
Mitragyna parvifolia (Roxb.) Korth.	Rubiaceae	400	250275	Bahraich
Mitragyna parvifolia (Roxb.) Korth.	Rubiaceae	MPF1	249648	Lucknow, NBRI, NBG
Mitragyna parvifolia (Roxb.) Korth.	Rubiaceae	MPF2	252733	Lucknow, NBRI, NBG
Moringa oleifera Lam.	Moringaceae	565	263603	Bahraich
Morus alba L.	Moraceae	626	263728	Lakhimpur - Kheri
Murraya koenigii (L.) Spreng.	Rutaceae	563	263601	Bahraich
Neolamarckia cadamba (Roxb.) Bosser	Rubiaceae	22	249073	Lucknow, NBRI, NBG
Neolamarckia cadamba (Roxb.) Bosser	Rubiaceae	58	249633	Lucknow, NBRI, NBG
Nyctanthes arbor-tristis L.	Oleaceae	7	249058	Lucknow, NBRI, NBG
Nyctanthes arbor-tristis L.	Oleaceae	178	249753	Lucknow, NBRI, NBG
Pithecellobium dulce (Roxb.) Benth.	Fabaceae (Mimosoideae)	269	250144	Lucknow, NBRI, NBG
Pithecellobium dulce (Roxb.) Benth.	Fabaceae (Mimosoideae)	295	250170	Lucknow, Kukrail forest
Pithecellobium dulce (Roxb.) Benth.	Fabaceae (Mimosoideae)	334	250209	Lucknow,Banthra
Plumeria alba L.	Apocynaceae	PA1	250348	Lucknow, NBRI, NBG
Plumeria alba L.	Apocynaceae	PA2	252738	Lucknow, NBRI, NBG
Plumeria rubra L.	Apocynaceae	PR1	252739	Lucknow, NBRI, NBG
Plumeria rubra L.	Apocynaceae	PR2	252740	Lucknow, NBRI, NBG
Plumeria rubra L.	Apocynaceae	PR3	250133	Lucknow, NBRI, NBG
Podocarpus macrophyllus (Thunb.) Sweet	Podocarpaceae	PDM1	252731	Lucknow, NBRI, NBG
Polyalthia longifolia (Sonn.) Thwaites	Annonaceae	5	249056	Lucknow, NBRI, NBG
Polyalthia longifolia (Sonn.) Thwaites	Annonaceae	26	249077	Lucknow, NBRI, NBG
Polyalthia longifolia (Sonn.) Thwaites	Annonaceae	135	249710	Lucknow, NBRI, NBG
Polyalthia longifolia (Sonn.) Thwaites	Annonaceae	142	249717	Lucknow
Polyalthia longifolia (Sonn.) Thwaites	Annonaceae	145	249720	Lucknow
Polyalthia longifolia (Sonn.) Thwaites	Annonaceae	PL1	252734	Lucknow, NBRI, NBG
Polyalthia longifolia (Sonn.) Thwaites	Annonaceae	PL2	252752	Lucknow, NBRI, NBG
Polyalthia longifolia (Sonn.) Thwaites	Annonaceae	PL3	252745	Lucknow, NBRI, NBG
Polyalthia longifolia (Sonn.) Thwaites	Annonaceae	PL4	252746	Lucknow, NBRI, NBG
Polyalthia suberosa (Roxb.) Thwaites	Annonaceae	370	250245	Maharajganj
Polyalthia suberosa (Roxb.) Thwaites	Annonaceae	PS1	252768	Lucknow, NBRI, NBG
Polyalthia suberosa (Roxb.) Thwaites	Annonaceae	PS2	252769	Lucknow, NBRI, NBG
Pongamia pinnata (L.) Pierr.	Fabaceae (Papilionoideae)	532	252213	Bahraich
Pongamia pinnata (L.) Pierre.	Fabaceae (Papilionoideae)	264	250139	Lucknow, NBRI, NBG
Pongamia pinnata (L.) Pierre.	Fabaceae (Papilionoideae)	289	250164	Lucknow, NBRI, NBG
Prunus persica (L.) Stokes	Rosaceae	620	263722	Lakhimpur – Kheri
Pterospermum acerifolium (L.) Willd.	Malvaceae	601	263703	Lakhimpur – Kheri
Pterospermum lanceifolium Roxb.	Malvaceae	33	249084	Lucknow, NBRI, NBG
Pterospermum lanceifolium Roxb.	Malvaceae	181	249756	Lucknow, NBRI, NBG
Pterygota alata (Roxb.) R. Br.	Malvaceae	30	249081	Lucknow, NBRI, NBG
Pterygota alata (Roxb.) R. Br.	Malvaceae	345	250220	Banthra research station
Putranjiva roxburghii Wall.	Putranjivaceae	548	252855	Bahraich
Putranjiva roxburghii Wall.	Putranjivaceae	618	263720	Lakhimpur – Kheri
Putranjiva roxburghii Wall.	Putranjivaceae	1	249052	Lucknow, NBRI, NBG
Putranjiva roxburghii Wall.	Putranjivaceae	332	250207	Lucknow,Banthra
Santalum album L.	Santalaceae	20	249071	Lucknow, NBRI, NBG
Santalum album L.	Santalaceae	372	250247	Maharajganj
Saraca declinata (Jack) Miq.	Fabaceae (Caesalpinioideae)	15	249066	Lucknow, NBRI, NBG
Saraca declinata (Jack) Miq.	Fabaceae (Caesalpinioideae)	165	249740	Lucknow, NBRI, NBG
Shorea robusta C. F. Gaertn.	Dipterocarpaceae	95	249670	Lucknow, NBRI, NBG
Shorea robusta C. F. Gaertn.	Dipterocarpaceae	237	250112	Bahraich
Shorea robusta C. F. Gaertn.	Dipterocarpaceae	398	250273	Bahraich
Sterculia urens Roxb.	Malvaceae	39	249090	Lucknow, NBRI, NBG
Sterculia urens Roxb.	Malvaceae	SU1	252774	Lucknow, NBRI, NBG
Sterculia urens Roxb.	Malvaceae	SU2	252728	Lucknow, NBRI, NBG
Sterculia foetida L.	Malvaceae	34	249085	Lucknow, NBRI, NBG
Sterculia foetida L.	Malvaceae	SF1	252748	Lucknow, NBRI, NBG
Sterculia foetida L.	Malvaceae	SF2	252749	Lucknow, NBRI, NBG
Sterculia foetida L.	Malvaceae	SF3	252750	Lucknow, NBRI, NBG
Stereospermum suaveolens	Bignoniaceae	536	252218	Bahraich
Streblus asper Lour.	Moracaea	644	263908	Maharajganj
Strychnos nux-vomica L.	Loganiaceae	112	249687	Lucknow, NBRI, NBG
Strychnos nux-vomica L.	Loganiaceae	559	252889	Bahraich
Strychnos nux-vomica L.	Loganiaceae	SN111	250399	Lucknow, NBRI, NBG
Strychnos nux-vomica L.	Loganiaceae	SN121	252743	Lucknow, NBRI, NBG
Strychnos nux-vomica L.	Loganiaceae	SN122	252744	Lucknow, NBRI, NBG
Strychnos potatorum L. f.	Loganiaceae	9	249060	Lucknow, NBRI, NBG
Strychnos potatorum L. f.	Loganiaceae	88	249663	Lucknow, NBRI, NBG
Strychnos potatorum L. f.	Loganiaceae	SPT1	252761	Lucknow, NBRI, NBG
Strychnos potatorum L. f.	Loganiaceae	SPT2	252759	Lucknow, NBRI, NBG
Swietenia macrophylla King	Meliaceae	247	250122	Lucknow, NBRI, NBG
Swietenia macrophylla King	Meliaceae	SM1	252723	Lucknow, NBRI, NBG
Swietenia macrophylla King	Meliaceae	SM2	252741	Lucknow, NBRI, NBG
Swietenia macrophylla King	Meliaceae	SM3	252742	Lucknow, NBRI, NBG
Swietenia mahogani (L.) Jacq.	Meliaceae	199	249774	Lucknow, NBRI, NBG
Swietenia mahogani (L.) Jacq.	Meliaceae	SMG2	252720	Lucknow, NBRI, NBG
Swietenia mahogani (L.) Jacq.	Meliaceae	SMG3	252727	Lucknow, NBRI, NBG
Syzygium cumini (L.) Skeels	Myrtaceae	331	250206	Lucknow,Banthra
Syzygium cumini (L.) Skeels	Myrtaceae	365	250240	Maharajganj
Syzygium jambos (L.) Alston	Myrtaceae	278	250153	Lucknow, NBRI, NBG
Syzyzium cuminii	Myrtaceae	568	263606	Bahraich
Tabebuia aurea (Silva Manso) Benth. & Hook. f. ex S. Moore	Bignoniaceae	3	252753	Lucknow, NBRI, NBG
Tabebuia aurea (Silva Manso) Benth. & Hook. f. ex S. Moore	Bignoniaceae	54	249629	Lucknow, NBRI, NBG
Tabebuia aurea (Silva Manso) Benth. & Hook. f. ex S. Moore	Bignoniaceae	154	249729	Lucknow, NBRI, NBG
Tabebuia aurea (Silva Manso) Benth. & Hook. f. ex S. Moore	Bignoniaceae	TA 1	252735	Lucknow, NBRI, NBG
Tabebuia aurea (Silva Manso) Benth. & Hook. f. ex S. Moore	Bignoniaceae	TA 2	252764	Lucknow, NBRI, NBG
Tabebuia aurea (Silva Manso) Benth. & Hook. f. ex S. Moore	Bignoniaceae	TA3	252736	Lucknow, NBRI, NBG
Tabebuia rosea (Bertol.) DC.	Bignoniaceae	TR1	252756	Lucknow, NBRI, NBG
Tabebuia rosea (Bertol.) DC.	Bignoniaceae	TR2	252757	Lucknow, NBRI, NBG
Tabernaemontana elegans Stapf	Apocynaceae	70	249645	Lucknow, NBRI, NBG
Tabernaemontana elegans Stapf	Apocynaceae	116	249691	Lucknow, NBRI, NBG
Tamarindus indica L.	Fabaceae	311	250186	Sitapur
Tectona grandis L. f.	Lamiaceae	96	249671	Lucknow, NBRI, NBG
Tectona grandis L. f.	Lamiaceae	366	250241	Maharajganj
Terminalia arjuna (Roxb. ex DC.) Wight & Arn.	Combretaceae	101	249676	Lucknow, NBRI, NBG
Terminalia arjuna (Roxb. ex DC.) Wight & Arn.	Combretaceae	131	249706	Lucknow, NBRI, NBG
Terminalia arjuna (Roxb. ex DC.) Wight & Arn.	Combretaceae	TA1311	252781	Lucknow, NBRI, NBG
Terminalia arjuna (Roxb. ex DC.) Wight & Arn.	Combretaceae	TA132	252722	Lucknow, NBRI, NBG
Terminalia bellirica (Gaertn.) Roxb.	Combretaceae	373	250248	Maharajganj
Terminalia elliptica Willd.	Combretaceae	397	250272	Bahraich
Terminalia muelleri Benth.	Combretaceae	14	249065	Lucknow, NBRI, NBG
Terminalia muelleri Benth.	Combretaceae	57	249632	Lucknow, NBRI, NBG
Terminalia muelleri Benth.	Combretaceae	TM571	252721	Lucknow, NBRI, NBG
Terminalia bellirica (Gaertn.) Roxb.	Combretaceae	TB1	249639	Lucknow, NBRI, NBG
Terminalia bellirica (Gaertn.) Roxb.	Combretaceae	TB64	250361	Lucknow, NBRI, NBG
Terminalia catappa L.	Combretaceae	133	249708	Lucknow, NBRI, NBG
Toona ciliata M. Roem.	Meliaceae	379	250254	Bahraich
Vitex negundo L.	Lamiaceae	VN1	249758	Lucknow, NBRI, NBG
Vitex pinnata L.	Lamiaceae	VN2	252751	Lucknow, NBRI, NBG
Vitex pinnata L.	Lamiaceae	VPN1	250372	Lucknow, NBRI, NBG
Wrightia coccinea Sims	Apocynaceae	WC1	252766	Lucknow, NBRI, NBG
Wrightia coccinea Sims	Apocynaceae	WC2	252767	Lucknow, NBRI, NBG
Wrightia tinctoria (Roxb.) R. Br.	Apocynaceae	WT1	249785	Lucknow, NBRI, NBG
Wrightia tinctoria (Roxb.) R. Br.	Apocynaceae	WT2	252780	Lucknow, NBRI, NBG
Ziziphus mauritiana Lam.	Rhamnaceae	384	250259	Bahraich
Ziziphus nummularia (Burm. f.) Wight & Arn.	Rhamnaceae	330	250205	Lucknow,Banthra
Ziziphus mauritiana Lam.	Rhamnaceae	270	250145	Lucknow, Kukrail forest
Ziziphus mauritiana Lam.	Rhamnaceae	301	250176	Lucknow NBRI NBG
*NBRI , National Botanic Research Institute
NBG, National Botanic Garden

## Sheet: Sheet2
Table S1: List of samples with species name, family, accession number and their location
species	family	tube no	accession#	location
Acacia catechu (L.f.) Willd.	Fabaceae (Mimosoideae)	294	250169	Lucknow, Kukrail forest
Acacia lenticularis Benth.	Fabaceae (Mimosoideae)	85	249660	Lucknow NBRI,$ NBG *
Acacia modesta Wall.	Fabaceae (Mimosoideae)	59	249634	Lucknow, NBRI, NBG
Acacia nilotica (L.) Delile	Fabaceae (Mimosoideae)	304	250179	Lucknow, Kukrail forest
Acacia spp	Fabaceae (Mimosoideae)	100	249675	Lucknow,Musabagh
Acacia auriculiformis A. Cunn. ex Benth.	Fabaceae (Mimosoideae)	16	249067	Lucknow, NBRI, NBG
Acacia auriculiformis A. Cunn. ex Benth.	Fabaceae (Mimosoideae)	115	249690	Lucknow, NBRI, NBG
Acacia auriculiformis A. Cunn. ex Benth.	Fabaceae (Mimosoideae)	378	250253	Bahraich
Aegle marmelos (L.) Correa	Rutaceae	564	263602	Bahraich
Aegle marmelos (L.) Correa	Rutaceae	647	263911	Bahraich
Aegle marmelos (L.) Corrêa	Rutaceae	253	250128	Lucknow, NBRI, NBG
Aegle marmelos (L.) Corrêa	Rutaceae	390	250265	Bahraich,
Afrocarpus gracilior (Pilg.) Page#	Podocarpaceae	PDG1	252730	Lucknow, NBRI, NBG
Afrocarpus gracilior (Pilg.) Page	Podocarpaceae	PDG2	252732	Lucknow, NBRI, NBG
Albizia lebbeck (L.) Benth.	Fabaceae(Mimosoideae)	534	252216	Bahraich
Albizia lebbeck (L.) Benth.	Fabaceae(Mimosoideae)	624	263726	Bahraich
Albizia amara (Roxb.) Boivin	Fabaceae (Mimosoideae)	205	249780	Lucknow, NBRI, NBG
Albizia lucidior (Steud.) I. C. Nielsen ex H. Hara	Fabaceae (Mimosoideae)	254	250129	Lucknow, NBRI, NBG
Albizia procera (Roxb.) Benth.	Fabaceae (Mimosoideae)	340	250215	Lucknow,Banthra
Alstonia scholaris (L.) R. Br.	Apocynaceae	617	263719	Bahraich
Alstonia macrophylla Wall. ex G. Don	Apocynaceae	117	249692	Lucknow,NBRI,NBG
Annona reticulata L.	Annonaceae	285	250160	Lucknow, NBRI, NBG
Anogeissus sericea Brandis	Combretaceae	226	250101	Lucknow, NBRI, NBG
Aphanamixis polystachya (Wall.) R. Parker	Meliaceae	106	249681	Lucknow, NBRI, NBG
Aphanamixis polystachya (Wall.) R. Parker	Meliaceae	341	250216	Lucknow,Banthra
Artocarpus heterophyllus Lam.	Moraceae	321	250196	Sitapur
Azadirachta indica A. Juss.	Meliaceae	46	249625	Masewal
Azadirachta indica A. Juss.	Meliaceae	132	249707	Lucknow, NBRI, NBG
Azadirachta indica A. Juss.	Meliaceae	146	249721	Lucknow
Azadirachta indica A. Juss.	Meliaceae	293	250168	Lucknow
Azadirachta indica A. Juss.	Meliaceae	318	250193	Sitapur
Azadirachta indica A. Juss.	Meliaceae	535	252217	Bahraich
Bauhinia acuminata L.	Fabaceae (Caesalpinioideae)	393	250268	Bahraich
Bauhinia malabarica Roxb.	Fabaceae (Caesalpinioideae)	561	252897	Bahraich
Bauhinia roxburghiana Voigt.	Fabaceae (Caesalpinioideae)	BR1	250157	Lucknow, NBRI,NBG
Bauhinia sp.	Fabaceae (Caesalpinioideae)	608	263710	Lakhimpur – Kheri
Bauhinia ×blakeana Dunn	Fabaceae (Caesalpinioideae)	167	249742	Lucknow, NBRI, NBG
Bauhinia ×blakeana Dunn	Fabaceae (Caesalpinioideae)	BB1	252773	Lucknow, NBRI, NBG
Bauhinia ×blakeana Dunn	Fabaceae (Caesalpinioideae)	BB2	252775	Lucknow, NBRI, NBG
Bauhinia purpurea L.	Fabaceae (Caesalpinioideae)	76	249651	Lucknow, NBRI, NBG
Bauhinia purpurea L.	Fabaceae (Caesalpinioideae)	163	250738	Lucknow, NBRI, NBG
Bauhinia purpurea L.	Fabaceae (Caesalpinioideae)	BP 1	249088	Lucknow, NBRI, NBG
Bauhinia purpurea L.	Fabaceae (Caesalpinioideae)	BP 2	252140	Bahraich
Bauhinia purpurea L.	Fabaceae (Caesalpinioideae)	BP 3	250400	Lucknow, NBRI, NBG
Bauhinia variegata L.	Fabaceae (Caesalpinioideae)	298	250173	Lucknow, Kukrail forest
Bauhinia variegata L.	Fabaceae (Caesalpinioideae)	BV 1	252770	Lucknow, NBRI, NBG
Bauhinia variegata L.	Fabaceae (Caesalpinioideae)	BV2	252771	Lucknow, NBRI, NBG
Bauhinia variegata L.	Fabaceae (Caesalpinioideae)	BV3	252772	Lucknow, NBRI, NBG
Blighia sapida K. D. Koenig	Sapindaceae	67	249642	Lucknow, NBRI, NBG
Blighia sapida K. D. Koenig	Sapindaceae	84	249659	Lucknow, NBRI, NBG
Brachychiton populneus (Schott & Endl.) R. Br.	Sterculiaceae	123	249698	Lucknow, NBRI, NBG
Brachychiton populneus (Schott & Endl.) R. Br.	Sterculiaceae	SD1	252726	Lucknow, NBRI, NBG,
Brachychiton populneus (Schott & Endl.) R. Br.	Sterculiaceae	SD2	252776	Lucknow, NBRI, NBG
Bridelia retusa (L.) A. Juss.	Phyllanthaceae	234	250109	Bahraich
Butea monosperma (Lam.) Taub.	Fabaceae (Papilionoideae)	187	249762	Lucknow, NBRI, NBG
Butea monosperma (Lam.) Taub.	Fabaceae (Papilionoideae)	394	250269	Bahraich
Butea monosperma (Lam.) Taub.	Fabaceae (Papilionoideae)	602	263704	Lakhimpur – Kheri
Caesalpinia spp	Fabaceae (Caesalpinioideae)	161	249736	Lucknow, NBRI, NBG
Caesalpinia cacalaco Humb. & Bonpl.	Fabaceae (Caesalpinioideae)	CCA1	252755	Lucknow, NBRI, NBG
Caesalpinia cacalaco Humb. & Bonpl.	Fabaceae (Caesalpinioideae)	CCA2	250396	Lucknow, NBRI, NBG
Caesalpinia coriaria (Jacq.) Willd.	Fabaceae (Caesalpinioideae)	172	249747	Lucknow, NBRI, NBG
Caesalpinia coriaria (Jacq.) Willd.	Fabaceae (Caesalpinioideae)	CLC1	252765	Lucknow, NBRI, NBG
Caesalpinia coriaria (Jacq.) Willd.	Fabaceae (Caesalpinioideae)	CLC1721	250394	Lucknow, NBRI, NBG
Caesalpinia coriaria (Jacq.) Willd.	Fabaceae (Caesalpinioideae)	CLC2	252758	Lucknow, NBRI, NBG
Caesalpinia gilliesii (Hook.) D. Dietr.	Fabaceae (Caesalpinioideae)	170	249745	Lucknow, NBRI, NBG
Caesalpinia mexicana A. Gray	Fabaceae (Caesalpinioideae)	171	249746	Lucknow, NBRI, NBG
Caesalpinia mexicana A. Gray	Fabaceae (Caesalpinioideae)	CM1	250395	Lucknow, NBRI, NBG
Caesalpinia mexicana A. Gray	Fabaceae (Caesalpinioideae)	CM2	252754	Lucknow, NBRI, NBG
Caesalpinia pannosa Brandegee	Fabaceae (Caesalpinioideae)	268	250143	Lucknow, NBRI, NBG
Caesalpinia pulcherrima (L.) Sw.	Fabaceae (Caesalpinioideae)	103	249678	Lucknow, NBRI,NBG
Callistemon citrinus (Curtis) Skeels	Myrtaceae	556	252876	Bahraich
Callistemon citrinus (Curtis) Skeels	Myrtaceae	CC 1	252719	Lucknow, NBRI, NBG
Callistemon citrinus (Curtis) Skeels	Myrtaceae	CC2	252724	Lucknow, NBRI, NBG
Callistemon citrinus (Curtis) Skeels	Myrtaceae	CC3	252737	Lucknow, NBRI, NBG
Callistemon lanceolatus (Sm.) Sweet	Myrtaceae	CL1	250397	Lucknow, NBRI, NBG
Callistemon lanceolatus (Sm.) Sweet	Myrtaceae	CL2	250398	Lucknow, NBRI, NBG
Callistemon lanceolatus (Sm.) Sweet	Myrtaceae	CL3	252729	Lucknow, NBRI, NBG
Callistemon polandii F.M.Bailey	Myrtaceae	177	249752	Lucknow, NBRI, NBG
Callistemon polandii F.M.Bailey	Myrtaceae	CP1	252760	Lucknow, NBRI, NBG
Callistemon polandii F.M.Bailey	Myrtaceae	CP2	252763	Lucknow, NBRI, NBG
Carissa spinarum L.	Apocynaceae	374	250249	Maharajganj
Cassia roxburghii DC.	Fabaceae (Caesalpinioideae)	362	250237	Kushinagar
Cassia sp	Fabaceae (Caesalpinioideae)	651	263915	Bahraich
Cassia spp	Fabaceae (Caesalpinioideae)	108	249683	Lucknow, NBRI, NBG
Cassia spp	Fabaceae (Caesalpinioideae)	208	249783	Lucknow, NBRI, NBG
Cassia fistula L.	Fabaceae (Caesalpinioideae)	308	250183	Lucknow, Kukrail forest
Cassia fistula L.	Fabaceae (Caesalpinioideae)	363	250238	Maharajganj
Cassia fistula L.	Fabaceae (Caesalpinioideae)	CF2	249734	Lucknow, NBRI, NBG
Cassia javanica L. subsp. nodosa (Buch.-Ham. ex Roxb.) K. Larsen & S. S. Larsen	Fabaceae (Caesalpinioideae)	CN1	249680	Lucknow, NBRI,NBG
Cassia javanica L. subsp. nodosa (Buch.-Ham. ex Roxb.) K. Larsen & S. S. Larsen	Fabaceae (Caesalpinioideae)	CN2	252762	Lucknow, NBRI, NBG
Casuarina equisetifolia L.	Casurinaceae	627	263729	Lakhimpur – Kheri
Casuarina equisetifolia L.	Casurinaceae	628	263730	Lakhimpur – Kheri
Ceiba pentandra (L.) Gaertn.	Bombacaceae	354	250229	Gorakhpur
Ceiba insignis (Kunth) P. E. Gibbs & Semir	Bombacaceae	3	249054	Lucknow, NBRI, NBG
Ceiba insignis (Kunth) P. E. Gibbs & Semir	Bombacaceae	12	249063	Lucknow, NBRI, NBG
Celtis tetrandra Roxb.	Cannabaceae	537	252219	Bahraich
Cordia dichotoma G. Forst.	Boraginaceae	386	250261	Bahraich
Dalbergia lanceolaria L. f.	Fabaceae (Papilionoideae)	38	249089	Lucknow, NBRI, NBG
Dalbergia lanceolaria L. f.	Fabaceae (Papilionoideae)	60	249635	Lucknow, NBRI, NBG
Dalbergia latifolia Roxb.	Fabaceae (Papilionoideae)	179	249754	Lucknow, NBRI, NBG
Dalbergia latifolia Roxb.	Fabaceae (Papilionoideae)	361	250236	Gorakhpur
Dalbergia latifolia Roxb.	Fabaceae (Papilionoideae)	DL3	252725	Lucknow, NBRI, NBG
Dalbergia sissoo Roxb. ex DC.	Fabaceae (Papilionoideae)	573	263611	Bahraich
Dalbergia sissoo Roxb. ex DC.	Fabaceae (Papilionoideae)	616	263718	Lakhimpur – Kheri
Dalbergia sissoo Roxb. ex DC.	Fabaceae (Papilionoideae)	DS1	250131	Lucknow, NBRI, NBG
Dalbergia sissoo Roxb. ex DC.	Fabaceae (Papilionoideae)	DS2	252747	Lucknow, NBRI, NBG
Derris ovalifolia (Wight & Arn.) Benth.	Fabaceae (Papilionoideae)	35	249086	Lucknow, NBRI, NBG
Desmodium oojeinense (Roxb.) Ohashi	Fabaceae (Papilionoideae)	359	250234	Gorakhpur
Diospyros spp	Ebenaceae	292	250167	Lucknow, Kukrail forest
Diospyros spp	Ebenaceae	335	250210	Lucknow,Banthra
Diospyros malabarica (Desr.) Kostel.	Ebenaceae	90	249665	Lucknow, NBRI, NBG
Ehretia laevis Roxb.	Ehretiaceae	569	263607	Bahraich
Ehretia laevis Roxb.	Ehretiaceae	389	250264	Bahraich
Emblica officinalis (Phyllanthus emblica)	Phyllanthaceae	606	263708	Lakhimpur – Kheri
Erythrina suberosa Roxb.	Fabaceae (Papilionoideae)	ES1	249760	Lucknow, NBRI, NBG
Erythrina suberosa Roxb.	Fabaceae (Papilionoideae)	ES2	252777	Lucknow, NBRI, NBG
Erythrina subumbrans (Hassk.) Merr.	Fabaceae (Papilionoideae)	182	249757	Lucknow, NBRI, NBG
Erythrina velutina Willd.	Fabaceae (Papilionoideae)	184	249759	Lucknow, NBRI, NBG
Erythrina velutina Willd.	Fabaceae (Papilionoideae)	EVL1	252779	Lucknow, NBRI, NBG
Erythrina velutina Willd.	Fabaceae (Papilionoideae)	EVL2	252778	Lucknow, NBRI, NBG
Erythrina vespertilio Benth.	Fabaceae (Papilionoideae)	189	249764	Lucknow, NBRI, NBG
Erythrina vespertilio Benth.	Fabaceae (Papilionoideae)	EV1	249765	Lucknow, NBRI, NBG
Erythrina vespertilio Benth.	Fabaceae (Papilionoideae)	EV2	249766	Lucknow, NBRI, NBG
Eucalyptus tereticornis Sm.	Myrtaceae	169	249744	Lucknow, NBRI, NBG
Ficus benghalensis L.	Moraceae	236	250111	Bahraich
Ficus benghalensis L.	Moraceae	383	250258	Bahraich
Ficus caulocarpa (Miq.) Miq	Moraceae	351	250226	Lucknow, Banthra
Ficus drupacea Thunb. var. pubescens (Roth) Corner	Moraceae	136	249711	Lucknow, NBRI, NBG
Ficus hispida L. f.	Moraceae	375	250250	Kushinagar
Ficus racemosa L.	Moraceae	358	250232	Gorakhpur
Ficus racemosa L.	Moraceae	364	250239	Maharajgan
Ficus racemosa L.	Moraceae	395	250270	Bahraich
Ficus racemosa L.	Moraceae	607	263709	Lakhimpur – Kheri
Ficus semicordata Buch. - Ham. ex J. E. Sm.	Moraceae	612	263714	Lakhimpur – Kheri
Ficus semicordata Buch. - Ham. ex J. E. Sm.	Moraceae	613	263715	Lakhimpur – Kheri
Ficus benghalensis L.	Moraceae	122	249697	Lucknow, NBRI, NBG
Ficus elastica Roxb. ex Hornem.	Moraceae	371	250246	Maharajganj
Ficus religiosa L.	Moraceae	130	249705	Lucknow, NBRI, NBG
Gardenia resinifera Roth	Rubiaceae	36	249087	Lucknow, NBRI, NBG
Gardenia resinifera Roth	Rubiaceae	221	249796	Lucknow, NBRI, NBG
Glycosmis pentaphylla (Retz.) DC.	Rutaceae	91	249666	Lucknow, NBRI, NBG
Glycosmis pentaphylla (Retz.) DC.	Rutaceae	235	250110	Bahraich
Gmelina arborea Roxb.	Verbenaceae	24	249075	Lucknow, NBRI, NBG
Haldina cordifolia	Rubiaceae	648	263912	Maharajganj
Haldina cordifolia (Roxb.) Ridsdale	Rubiaceae	399	250274	Bahraich,
Handroanthus chrysotrichus (Mart. ex DC.) Mattos	Bignoniaceae	TC1	250282	Lucknow, NBRI, NBG
Handroanthus impetiginosus (Mart. ex DC.) Mattos	Bignoniaceae	207	249782	Lucknow, NBRI, NBG
Hibiscus rosa-sinensis L.	Malvaceae	25	249076	Lucknow, NBRI, NBG
Hibiscus rosa-sinensis L.	Malvaceae	78	249653	Lucknow, NBRI, NBG
Hibiscus rosa-sinensis L.	Malvaceae	621	263723	Lakhimpur – Kheri
Holarrhena pubescens Wall. ex G. Don	Apocynaceae	279	250154	Lucknow, NBRI, NBG
Holoptelea integrifolia (Roxb.) Planch.	Ulmaceae	540	252236	Bahraich
Holoptelea integrifolia (Roxb.) Planch.	Ulmaceae	625	263727	Bahraich
Holoptelea integrifolia (Roxb.) Planch.	Ulmaceae	99	249674	Lucknow, Musabagh
Holoptelea integrifolia (Roxb.) Planch.	Ulmaceae	296	250171	Lucknow, Kukrail forest
Holoptelea integrifolia (Roxb.) Planch.	Ulmaceae	307	250182	Lucknow, Kukrail forest
Holoptelea integrifolia (Roxb.) Planch.	Ulmaceae	312	250187	Sitapur
Isonandra villosa Wight	Sapotaceae	27	249078	Lucknow, NBRI, NBG
Isonandra villosa Wight	Sapotaceae	65	249640	Lucknow, NBRI, NBG
Ixora pavetta Andrews	Rubiaceae	259	250134	Lucknow, NBRI, NBG
Jacaranda cuspidifolia Mart.	Bignoniaceae	121	249696	Lucknow, NBRI, NBG
Jacaranda mimosifolia D.Don	Bignoniaceae	53	249628	Lucknow, NBRI, NBG
Lagerstroemia hirsuta (Lam.) Willd.	Lythraceae	176	249751	Lucknow, NBRI, NBG
Lagerstroemia duperreana Pierre ex Gagnep.	Lythraceae	13	249064	Lucknow, NBRI, NBG
Lagerstroemia loudonii Teijsm. & Binn.	Lythraceae	283	250158	Lucknow, NBRI, NBG
Lagerstroemia parviflora Roxb.	Lythraceae	388	250263	Bahraich
Lagerstroemia speciosa (L.) Pers.	Lythraceae	79	249654	Lucknow, NBRI, NBG
Leucaena leucocephala (Lam.) de Wit.	Fabaceae(Mimosoideae)	619	263721	Lakhimpur – Kheri
Mallotus philippensis (Lam.) Muell.-Arg.	Euphorbiaceae	238	250113	Bahraich
Mallotus philippensis (Lam.) Muell.-Arg.	Euphorbiaceae	369	250244	Maharajganj
Mallotus philippensis (Lam.) Muell.-Arg.	Euphorbiaceae	611	263713	Lakhimpur – Kheri
Mangifera indica L.	Anacardiaceae	381	250256	Bahraich
Mangifera indica L.	Anacardiaceae	566	263604	Bahraich
Mangifera indica L.	Anacardiaceae	631	263733	Lakhimpur – Kheri
Manilkara hexandra (Roxb.) Dubard	Sapotaceae	233	250108	Lucknow, NBRI, NBG
Manilkara zapota (L.) P. Royen	Sapotaceae	63	249638	Lucknow, NBRI, NBG
Manilkara zapota (L.) P. Royen	Sapotaceae	315	250190	Sitapur
Melia azadirach L.	Meliaceae	45	249624	Masewal Ropar
Melia azadirach L.	Meliaceae	615	263717	Lakhimpur – Kheri
Melia azedarach L.	Meliaceae	89	249664	Lucknow, NBRI, NBG
Melia azedarach L.	Meliaceae	140	249715	Lucknow
Millettia peguensis Ali	Fabaceae (Papilionoideae)	173	249748	Lucknow, NBRI, NBG
Mitragyna parvifolia (Roxb.) Korth.	Rubiaceae	337	250212	Banthra research station
Mitragyna parvifolia (Roxb.) Korth.	Rubiaceae	400	250275	Bahraich
Mitragyna parvifolia (Roxb.) Korth.	Rubiaceae	MPF1	249648	Lucknow, NBRI, NBG
Mitragyna parvifolia (Roxb.) Korth.	Rubiaceae	MPF2	252733	Lucknow, NBRI, NBG
Moringa oleifera Lam.	Moringaceae	565	263603	Bahraich
Morus alba L.	Moraceae	626	263728	Lakhimpur - Kheri
Murraya koenigii (L.) Spreng.	Rutaceae	563	263601	Bahraich
Neolamarckia cadamba (Roxb.) Bosser	Rubiaceae	22	249073	Lucknow, NBRI, NBG
Neolamarckia cadamba (Roxb.) Bosser	Rubiaceae	58	249633	Lucknow, NBRI, NBG
Nyctanthes arbor-tristis L.	Oleaceae	7	249058	Lucknow, NBRI, NBG
Nyctanthes arbor-tristis L.	Oleaceae	178	249753	Lucknow, NBRI, NBG
Pithecellobium dulce (Roxb.) Benth.	Fabaceae (Mimosoideae)	269	250144	Lucknow, NBRI, NBG
Pithecellobium dulce (Roxb.) Benth.	Fabaceae (Mimosoideae)	295	250170	Lucknow, Kukrail forest
Pithecellobium dulce (Roxb.) Benth.	Fabaceae (Mimosoideae)	334	250209	Lucknow,Banthra
Plumeria alba L.	Apocynaceae	PA1	250348	Lucknow, NBRI, NBG
Plumeria alba L.	Apocynaceae	PA2	252738	Lucknow, NBRI, NBG
Plumeria rubra L.	Apocynaceae	PR1	252739	Lucknow, NBRI, NBG
Plumeria rubra L.	Apocynaceae	PR2	252740	Lucknow, NBRI, NBG
Plumeria rubra L.	Apocynaceae	PR3	250133	Lucknow, NBRI, NBG
Podocarpus macrophyllus (Thunb.) Sweet	Podocarpaceae	PDM1	252731	Lucknow, NBRI, NBG
Polyalthia longifolia (Sonn.) Thwaites	Annonaceae	5	249056	Lucknow, NBRI, NBG
Polyalthia longifolia (Sonn.) Thwaites	Annonaceae	26	249077	Lucknow, NBRI, NBG
Polyalthia longifolia (Sonn.) Thwaites	Annonaceae	135	249710	Lucknow, NBRI, NBG
Polyalthia longifolia (Sonn.) Thwaites	Annonaceae	142	249717	Lucknow
Polyalthia longifolia (Sonn.) Thwaites	Annonaceae	145	249720	Lucknow
Polyalthia longifolia (Sonn.) Thwaites	Annonaceae	PL1	252734	Lucknow, NBRI, NBG
Polyalthia longifolia (Sonn.) Thwaites	Annonaceae	PL2	252752	Lucknow, NBRI, NBG
Polyalthia longifolia (Sonn.) Thwaites	Annonaceae	PL3	252745	Lucknow, NBRI, NBG
Polyalthia longifolia (Sonn.) Thwaites	Annonaceae	PL4	252746	Lucknow, NBRI, NBG
Polyalthia suberosa (Roxb.) Thwaites	Annonaceae	370	250245	Maharajganj
Polyalthia suberosa (Roxb.) Thwaites	Annonaceae	PS1	252768	Lucknow, NBRI, NBG
Polyalthia suberosa (Roxb.) Thwaites	Annonaceae	PS2	252769	Lucknow, NBRI, NBG
Pongamia pinnata (L.) Pierr.	Fabaceae (Papilionoideae)	532	252213	Bahraich
Pongamia pinnata (L.) Pierre.	Fabaceae (Papilionoideae)	264	250139	Lucknow, NBRI, NBG
Pongamia pinnata (L.) Pierre.	Fabaceae (Papilionoideae)	289	250164	Lucknow, NBRI, NBG
Prunus persica (L.) Stokes	Rosaceae	620	263722	Lakhimpur – Kheri
Pterospermum acerifolium (L.) Willd.	Malvaceae	601	263703	Lakhimpur – Kheri
Pterospermum lanceifolium Roxb.	Malvaceae	33	249084	Lucknow, NBRI, NBG
Pterospermum lanceifolium Roxb.	Malvaceae	181	249756	Lucknow, NBRI, NBG
Pterygota alata (Roxb.) R. Br.	Malvaceae	30	249081	Lucknow, NBRI, NBG
Pterygota alata (Roxb.) R. Br.	Malvaceae	345	250220	Banthra research station
Putranjiva roxburghii Wall.	Putranjivaceae	548	252855	Bahraich
Putranjiva roxburghii Wall.	Putranjivaceae	618	263720	Lakhimpur – Kheri
Putranjiva roxburghii Wall.	Putranjivaceae	1	249052	Lucknow, NBRI, NBG
Putranjiva roxburghii Wall.	Putranjivaceae	332	250207	Lucknow,Banthra
Santalum album L.	Santalaceae	20	249071	Lucknow, NBRI, NBG
Santalum album L.	Santalaceae	372	250247	Maharajganj
Saraca declinata (Jack) Miq.	Fabaceae (Caesalpinioideae)	15	249066	Lucknow, NBRI, NBG
Saraca declinata (Jack) Miq.	Fabaceae (Caesalpinioideae)	165	249740	Lucknow, NBRI, NBG
Shorea robusta C. F. Gaertn.	Dipterocarpaceae	95	249670	Lucknow, NBRI, NBG
Shorea robusta C. F. Gaertn.	Dipterocarpaceae	237	250112	Bahraich
Shorea robusta C. F. Gaertn.	Dipterocarpaceae	398	250273	Bahraich
Sterculia urens Roxb.	Malvaceae	39	249090	Lucknow, NBRI, NBG
Sterculia urens Roxb.	Malvaceae	SU1	252774	Lucknow, NBRI, NBG
Sterculia urens Roxb.	Malvaceae	SU2	252728	Lucknow, NBRI, NBG
Sterculia foetida L.	Malvaceae	34	249085	Lucknow, NBRI, NBG
Sterculia foetida L.	Malvaceae	SF1	252748	Lucknow, NBRI, NBG
Sterculia foetida L.	Malvaceae	SF2	252749	Lucknow, NBRI, NBG
Sterculia foetida L.	Malvaceae	SF3	252750	Lucknow, NBRI, NBG
Stereospermum suaveolens	Bignoniaceae	536	252218	Bahraich
Streblus asper Lour.	Moracaea	644	263908	Maharajganj
Strychnos nux-vomica L.	Loganiaceae	112	249687	Lucknow, NBRI, NBG
Strychnos nux-vomica L.	Loganiaceae	559	252889	Bahraich
Strychnos nux-vomica L.	Loganiaceae	SN111	250399	Lucknow, NBRI, NBG
Strychnos nux-vomica L.	Loganiaceae	SN121	252743	Lucknow, NBRI, NBG
Strychnos nux-vomica L.	Loganiaceae	SN122	252744	Lucknow, NBRI, NBG
Strychnos potatorum L. f.	Loganiaceae	9	249060	Lucknow, NBRI, NBG
Strychnos potatorum L. f.	Loganiaceae	88	249663	Lucknow, NBRI, NBG
Strychnos potatorum L. f.	Loganiaceae	SPT1	252761	Lucknow, NBRI, NBG
Strychnos potatorum L. f.	Loganiaceae	SPT2	252759	Lucknow, NBRI, NBG
Swietenia macrophylla King	Meliaceae	247	250122	Lucknow, NBRI, NBG
Swietenia macrophylla King	Meliaceae	SM1	252723	Lucknow, NBRI, NBG
Swietenia macrophylla King	Meliaceae	SM2	252741	Lucknow, NBRI, NBG
Swietenia macrophylla King	Meliaceae	SM3	252742	Lucknow, NBRI, NBG
Swietenia mahogani (L.) Jacq.	Meliaceae	199	249774	Lucknow, NBRI, NBG
Swietenia mahogani (L.) Jacq.	Meliaceae	SMG2	252720	Lucknow, NBRI, NBG
Swietenia mahogani (L.) Jacq.	Meliaceae	SMG3	252727	Lucknow, NBRI, NBG
Syzygium cumini (L.) Skeels	Myrtaceae	331	250206	Lucknow,Banthra
Syzygium cumini (L.) Skeels	Myrtaceae	365	250240	Maharajganj
Syzygium jambos (L.) Alston	Myrtaceae	278	250153	Lucknow, NBRI, NBG
Syzyzium cuminii	Myrtaceae	568	263606	Bahraich
Tabebuia aurea (Silva Manso) Benth. & Hook. f. ex S. Moore	Bignoniaceae	3	252753	Lucknow, NBRI, NBG
Tabebuia aurea (Silva Manso) Benth. & Hook. f. ex S. Moore	Bignoniaceae	54	249629	Lucknow, NBRI, NBG
Tabebuia aurea (Silva Manso) Benth. & Hook. f. ex S. Moore	Bignoniaceae	154	249729	Lucknow, NBRI, NBG
Tabebuia aurea (Silva Manso) Benth. & Hook. f. ex S. Moore	Bignoniaceae	TA 1	252735	Lucknow, NBRI, NBG
Tabebuia aurea (Silva Manso) Benth. & Hook. f. ex S. Moore	Bignoniaceae	TA 2	252764	Lucknow, NBRI, NBG
Tabebuia aurea (Silva Manso) Benth. & Hook. f. ex S. Moore	Bignoniaceae	TA3	252736	Lucknow, NBRI, NBG
Tabebuia rosea (Bertol.) DC.	Bignoniaceae	TR1	252756	Lucknow, NBRI, NBG
Tabebuia rosea (Bertol.) DC.	Bignoniaceae	TR2	252757	Lucknow, NBRI, NBG
Tabernaemontana elegans Stapf	Apocynaceae	70	249645	Lucknow, NBRI, NBG
Tabernaemontana elegans Stapf	Apocynaceae	116	249691	Lucknow, NBRI, NBG
Tamarindus indica L.	Fabaceae	311	250186	Sitapur
Tectona grandis L. f.	Lamiaceae	96	249671	Lucknow, NBRI, NBG
Tectona grandis L. f.	Lamiaceae	366	250241	Maharajganj
Terminalia arjuna (Roxb. ex DC.) Wight & Arn.	Combretaceae	101	249676	Lucknow, NBRI, NBG
Terminalia arjuna (Roxb. ex DC.) Wight & Arn.	Combretaceae	131	249706	Lucknow, NBRI, NBG
Terminalia arjuna (Roxb. ex DC.) Wight & Arn.	Combretaceae	TA1311	252781	Lucknow, NBRI, NBG
Terminalia arjuna (Roxb. ex DC.) Wight & Arn.	Combretaceae	TA132	252722	Lucknow, NBRI, NBG
Terminalia bellirica (Gaertn.) Roxb.	Combretaceae	373	250248	Maharajganj
Terminalia elliptica Willd.	Combretaceae	397	250272	Bahraich
Terminalia muelleri Benth.	Combretaceae	14	249065	Lucknow, NBRI, NBG
Terminalia muelleri Benth.	Combretaceae	57	249632	Lucknow, NBRI, NBG
Terminalia muelleri Benth.	Combretaceae	TM571	252721	Lucknow, NBRI, NBG
Terminalia bellirica (Gaertn.) Roxb.	Combretaceae	TB1	249639	Lucknow, NBRI, NBG
Terminalia bellirica (Gaertn.) Roxb.	Combretaceae	TB64	250361	Lucknow, NBRI, NBG
Terminalia catappa L.	Combretaceae	133	249708	Lucknow, NBRI, NBG
Toona ciliata M. Roem.	Meliaceae	379	250254	Bahraich
Vitex negundo L.	Lamiaceae	VN1	249758	Lucknow, NBRI, NBG
Vitex pinnata L.	Lamiaceae	VN2	252751	Lucknow, NBRI, NBG
Vitex pinnata L.	Lamiaceae	VPN1	250372	Lucknow, NBRI, NBG
Wrightia coccinea Sims	Apocynaceae	WC1	252766	Lucknow, NBRI, NBG
Wrightia coccinea Sims	Apocynaceae	WC2	252767	Lucknow, NBRI, NBG
Wrightia tinctoria (Roxb.) R. Br.	Apocynaceae	WT1	249785	Lucknow, NBRI, NBG
Wrightia tinctoria (Roxb.) R. Br.	Apocynaceae	WT2	252780	Lucknow, NBRI, NBG
Ziziphus mauritiana Lam.	Rhamnaceae	384	250259	Bahraich
Ziziphus nummularia (Burm. f.) Wight & Arn.	Rhamnaceae	330	250205	Lucknow,Banthra
Ziziphus mauritiana Lam.	Rhamnaceae	270	250145	Lucknow, Kukrail forest
Ziziphus mauritiana Lam.	Rhamnaceae	301	250176	Lucknow NBRI NBG
$ NBRI , National Botanic Research Institute
* NBG, National Botanic Garden
# The samples which were successfully sequenced by each of the loci, ITS, trnh-psbA and rbcL are shown in bold. The sequences of ITS2 and matK are not included due to low PCR success rate
